# Supplementary material for: Morbidity and mortality patterns of preterm low birthweight neonates admitted to referral hospitals in the Amhara region of Ethiopia: retrospective follow-up study
Source: PubMed Central journal article supplement — BMJ Open. 2022 Jul 8;12(7):e054574. doi: 10.1136/bmjopen-2021-054574 (PMC9272098; doi:10.1136/bmjopen-2021-054574), 2022-07-08
Supplement: bmjopen-2021-054574.draft_revisions.pdf [file bmjopen-2021-054574.draft_revisions.pdf]

# BMJ Open

BMJ Open is committed to open peer review. As part of this commitment we make the peer review history of every article we publish publicly available.

When an article is published we post the peer reviewers' comments and the authors' responses online. We also post the versions of the paper that were used during peer review. These are the versions that the peer review comments apply to.

The versions of the paper that follow are the versions that were submitted during the peer review process. They are not the versions of record or the final published versions. They should not be cited or distributed as the published version of this manuscript.

BMJ Open is an open access journal and the full, final, typeset and author-corrected version of record of the manuscript is available on our site with no access controls, subscription charges or pay-per-view fees (<http://bmjopen.bmj.com>).

If you have any questions on BMJ Open's open peer review process please email [info.bmjopen@bmj.com](mailto:info.bmjopen@bmj.com)

# BMJ Open

## MORBIDITY AND MORTALITY PATTERN OF PRETERM LOW BIRTH WEIGHT NEONATES ADMITTED IN AMHARA REGION REFFERAL HOSPITALS OF ETHIOPIA: RETROSPECTIVE FOLLOWUP STUDY

|                               |                                                                                                                                                                                                                          |
|-------------------------------|--------------------------------------------------------------------------------------------------------------------------------------------------------------------------------------------------------------------------|
| Journal:                      | <i>BMJ Open</i>                                                                                                                                                                                                          |
| Manuscript ID                 | bmjopen-2021-054574                                                                                                                                                                                                      |
| Article Type:                 | Original research                                                                                                                                                                                                        |
| Date Submitted by the Author: | 23-Jun-2021                                                                                                                                                                                                              |
| Complete List of Authors:     | Genie, Yalemtehay; Mizan-Tepi University, Department of nursing<br>Fenta, Belete; Jimma University<br>Silesh, Mulualem ; Debre Berhan University, Department of midwifery<br>Tilahun, Desalew; Jimma University, Nursing |
| Keywords:                     | Paediatric clinical genetics & dysmorphology < GENETICS, Neonatal intensive & critical care < INTENSIVE & CRITICAL CARE, NEONATOLOGY, Paediatric intensive & critical care < ANAESTHETICS                                |
|                               |                                                                                                                                                                                                                          |

SCHOLARONE™  
Manuscripts

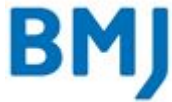

I, the Submitting Author has the right to grant and does grant on behalf of all authors of the Work (as defined in the below author licence), an exclusive licence and/or a non-exclusive licence for contributions from authors who are: i) UK Crown employees; ii) where BMJ has agreed a CC-BY licence shall apply, and/or iii) in accordance with the terms applicable for US Federal Government officers or employees acting as part of their official duties; on a worldwide, perpetual, irrevocable, royalty-free basis to BMJ Publishing Group Ltd ("BMJ") its licensees and where the relevant Journal is co-owned by BMJ to the co-owners of the Journal, to publish the Work in this journal and any other BMJ products and to exploit all rights, as set out in our [licence](#).

The Submitting Author accepts and understands that any supply made under these terms is made by BMJ to the Submitting Author unless you are acting as an employee on behalf of your employer or a postgraduate student of an affiliated institution which is paying any applicable article publishing charge ("APC") for Open Access articles. Where the Submitting Author wishes to make the Work available on an Open Access basis (and intends to pay the relevant APC), the terms of reuse of such Open Access shall be governed by a Creative Commons licence – details of these licences and which [Creative Commons](#) licence will apply to this Work are set out in our licence referred to above.

Other than as permitted in any relevant BMJ Author's Self Archiving Policies, I confirm this Work has not been accepted for publication elsewhere, is not being considered for publication elsewhere and does not duplicate material already published. I confirm all authors consent to publication of this Work and authorise the granting of this licence.

1  
2  
3 **MORBIDITY AND MORTALITY PATTERN OF PRETERM LOW BIRTH WEIGHT**  
4 **NEONATES ADMITTED IN AMHARA REGION REFERRAL HOSPITALS OF**  
5 **ETHIOPIA: RETROSPECTIVE FOLLOWUP STUDY**  
6  
7  
8  
9

10 Yalemtehay Dagnaw Genie<sup>1\*</sup>, Belete Fenta Kebede<sup>2</sup>, Mulualem Silesh Zerihun<sup>3</sup>, Desalew  
11  
12  
13 Tilahun Beyene<sup>4</sup>  
14  
15

16 **Affiliation**  
17  
18

19 <sup>1</sup>Department of nursing, MizanTepi University, Ethiopia  
20  
21

22 <sup>2</sup>School of midwifery, Jimma University, Ethiopia  
23  
24

25 <sup>3</sup>Department of midwifery, Debre Birhan University, Ethiopia  
26  
27

28 <sup>4</sup>Department of Nursing, Jimma University, Ethiopia  
29  
30  
31

32 **Author address**  
33

34 Yalemtehay Dagnaw: tsehayworld@gmail.com  
35

36 Belete Fenta: Gmail belete121wy@gmail.com  
37

38 Mulualem Silesh: Gmail-sileshmulualem22@gmail.com  
39

40 **Desalew Tilahun, Gmail-**

41  
42 **\* Corresponding author**  
43

44 **yalemtehay dagnaw**  
45  
46

47 Department of nursing, MizanTepi University, Ethiopia  
48  
49

50 **E-mail address: [tsehayworld@gmail.com](mailto:tsehayworld@gmail.com)**  
51  
52

53 **Word count=3401**  
54  
55

## Abstract

**Objective:** This study was conducted to assess morbidity and mortality pattern of preterm low birth weight neonates admitted in Amhara region referral hospitals of Ethiopia.

**Methodology:** Retrospective follow-up study was conducted on preterm low birth weight neonates admitted in Amhara region referral hospital between January 01 /2017 and December 30 /2018. Data were entered into Epi- data 4.4.2.1 and exported to STATA 14 for cleaning and analysis. Logistic regression model was used to analyze the data.

**Result:** This study revealed that 37.8 %( 95%CI: 32.4-43.5) of participants were died. The most common morbidities found in preterm low birth neonates was 219 (75.26%) hypothermia followed by 201(69.07%), 145(49.83%), 39(13.4%) and 24(8.25%) with sepsis, respiratory distress, jaundice and congenital anomalies respectively. Sepsis (AOR: 2.06(95% CI: 1.05-4.02), respiratory distress (AOR: 3.28 (95% CI: 1.81-5.95), congenital anomalies (AOR: 3.14(95%CI: 1.16-8.54), hypoglycemia (AOR 3.81(95%CI: 1.27-11.44) were independent factors associated with mortality.

**Conclusion:** In this study, mortality of preterm low birth neonatal was higher and public health issue. Hypothermia, Sepsis, respiratory distress, jaundice, and congenital anomaly were common morbidities. Sepsis, respiratory distress, hypoglycemia, and congenital anomaly were independent factors of mortality.

**Key words:** morbidity, mortality, pattern, preterm low birth weight, Amhara region, Ethiopia

## Article summary

### Strength and limitation of the study

- The study was conducted at multisite referral hospitals, which increases the likelihood of generalizability to the entire population that the sample was drawn.
- This study used a multivariate logistic regression analysis to regulate all likely confounders.
- Data were collected from secondary source and some factors that can't be found in the patient medical chart which will have a significant association with death may be missed.

## Introduction

Globally, in 2017 there was about 5.4 million under- five mortality, out of which 2.5 million were died in the first 28 days, with approximately two- third and 80% of the neonates were delivered with preterm and low birth weight respectively(1). An increasing number in delivery of preterm low birth weight (LBW) neonates were one of the leading causes for the leveling off infant mortality and neonatal mortality rates in 2013 in the United States of America (2). In many Asian and African countries being born preterm LBW was found as the main risk factor for the development of different morbidities and neonatal mortality (3,4). In Sri Lanka, about 28% of neonates were died due to Low birth weight and prematurity (4).

Preterm LBW- related morbidities were found as the main causes of admission in the neonatal intensive care unit (NICU). In Bangladesh, 12.4% of admission were due to preterm LBW and preterm LBW were the cause for 6.5% of deaths (5). Furthermore, preterm LBW lead to

1  
2  
3 prolonged stay of neonates in the hospital and can lead to adverse neurodevelopmental outcome  
4  
5 shows the greatest concern for the family and the society in future (6). In different regions of  
6  
7 Ethiopia being born preterm low birth weight was the major contributor for neonatal deaths and  
8  
9 neonate born with less birth weight and preterm showed higher mortality during the neonatal  
10  
11 period than normal birth weight and term neonates(7,8)(9)(10). In the southwest region of  
12  
13 Ethiopia from all neonatal deaths of 22.8%, more than two- third (76%) of death were caused by  
14  
15 LBW and prematurity (10).  
16  
17  
18  
19

20 Despite the initiation of modern techniques of NICU facilities, preterm LBW neonates are still at  
21  
22 high risk for the development of numerous morbidities (11). The overall mortality of preterm  
23  
24 low birth weight neonates varies depending on the pattern of morbidities (12). Preterm low birth  
25  
26 weight neonates are predisposed to infectious diseases due to their immature immune system and  
27  
28 develops many severe morbidities such as; hypoglycemia, respiratory distress syndrome (RDS)  
29  
30 (13), sepsis , jaundice, apnea, and birth asphyxia(14,15). The rate of mortality rate in preterm  
31  
32 LBW neonates was different depending on morbidity type (16,17). The risk of developing  
33  
34 morbidities was varying in a different category of preterm LBW neonates. The extremely low  
35  
36 birth weight (ELBW) and extremely preterm neonates had higher rates of all the morbidities and  
37  
38 mortalities(18).  
39  
40  
41  
42  
43

44 Some trials are started to implement now for the prevention of preterm LBW birth and  
45  
46 reductions of neonatal morbidity and mortality related to preterm LBW. The sustainable  
47  
48 development goal three emphasizes on reducing neonatal deaths with the goal of 12 neonatal  
49  
50 deaths per 1000 live births per country by 2030 through different interventions including of:  
51  
52  
53  
54  
55

1  
2  
3 kangaroo mother care and extra support for feeding Low birth weight and preterm babies with  
4 breast milk and other many interventions at postnatal period (19).  
5  
6

7  
8 Despite these trials, many findings of previous studies in Ethiopia had identified a high  
9 prevalence of preterm LBW neonates and had a higher risk of neonatal morbidity and mortality  
10 in those preterm LBW neonates. Eventhouh prevalence of preterm LBW birth is high there is an  
11 information gap about the pattern of morbidity and mortality in preterm low birth weight  
12 neonates and the factors associated with mortality in this study area. Therefore, this study aimed  
13 to assess the morbidity and mortality pattern of preterm low birth weight neonates admitted in  
14 Amhara region referral hospitals of Ethiopia to fill information gap. The finding of the study will  
15 help to identify major morbidities and know about the causes of mortality for preterm LBW  
16 neonates and to apply prevention strategy of modifiable causes of mortality for health care  
17 providers. Further for Amhara region referral hospitals will help to see the gaps on preterm LBW  
18 neonatal mortality. More over the study will also provide some insights for future researches to  
19 work along this line.  
20  
21  
22  
23  
24  
25  
26  
27  
28  
29  
30  
31  
32  
33  
34  
35

## 36 37 **Methods**

### 38 39 40 41 **Study design, area and period**

42  
43  
44 Institutional based retrospective follow- up study was conducted among preterm LBW neonates  
45 admitted in the NICU ward of selected Amhara region referral hospitals between January  
46 01/2017 and December 30 /2018.The study was conducted in selected referral hospitals of the  
47 Amhara region. Among all four referral hospitals in the region; Felege Hiwot Referral Hospital  
48  
49  
50  
51  
52  
53  
54  
55  
56  
57  
58  
59  
60



(FHRH), Debremarkos, Dessie, and Debrebirhan, two of them (FHRH, Dessie referral hospital) were selected by lottery method. The study was conducted from December 2018 to June 2019.

### **Population, eligibility criteria**

All neonates with a gestational age of less than 37 weeks weighing 500-2499g admitted in Amhara region referral hospitals of NICU ward were the source population. All selected preterm low birth weight neonates admitted in Amhara region referral hospitals of NICU ward from January 01/2017 to December 30 /2018 were the study population. Live birth neonates with a gestational age of less than 37 weeks weighing 500-2499g admitted in Amhara region referral hospitals of NICU ward were eligible in the study.

### **Sampling techniques and procedure**

From four referral hospitals found in the Amhara region, FHRH and Dessie Referral Hospital were selected by lottery method. The samples were proportionally allocated for each hospital. All preterm LBW neonates admitted in the NICU ward between January/ 1 /2017- December/ 30 /2018 were recruited by using the admission registration book by recording their medical record numbers sequentially. A Simple random sampling technique was used to select a required number of study participants.

### **Variables of the study**

The dependent variable was an outcome of preterm LBW neonates dichotomized into death or alive. The independent variables of the study included were include: Socio-demographic variables (Sex of neonate, age of neonate, age of mother), Maternal and obstetric related variables (Maternal disease (HIV, DM), pregnancy status, Pregnancy- induced hypertension) ,

1  
2  
3 complication/morbidity related variables (Sepsis, necrotizing enterocolitis, intraventricular  
4 hemorrhage, asphyxia, RDS, jaundice, pulmonary hemorrhage, congenital anomalies,  
5  
6 hypothermia, hypoglycemia) and neonatal related variables (place of delivery, mode of delivery)  
7  
8 were included.  
9  
10  
11  
12

### 13 **Data collection tools and procedures**

14  
15  
16 After reviewing of different literature, the checklist was adapted to address the objective of the  
17 study. The checklist consists of information on maternal and neonatal socio-demographic data,  
18 neonatal- related factors, complication/morbidity factors, maternal and obstetrics- related factors.  
19  
20 Data were extracted from each neonatal medical chart by using a structured checklist adapted  
21 from different literature.  
22  
23  
24  
25  
26  
27

### 28 **Data quality assurance**

29  
30  
31 To ensure the quality of data, different measures were undertaken. One day of training was given  
32 to data collectors and supervisors on the objective of the study and how to gather information by  
33 using the prepared data extraction checklist. Data were collected by six nurses working in NICU  
34 who were taking NICU training. One MSC nurse supervisor was assigned for support and  
35 facilitation of data collection in each selected site of the data collection area. Supervision of data  
36 collectors about the data collection process was done by the supervisor. The supervisor checked  
37 daily evaluation about the completeness of the filled checklist.  
38  
39  
40  
41  
42  
43  
44  
45  
46  
47

### 48 **Data processing, analysis and presentation**

49  
50  
51 After checking data completeness and consistency, the collected data were coded and entered  
52 into to Epi-data statistical software package version 4.4.2.1. Then the data exported to STATA  
53  
54  
55

version14 for cleaning and analysis. Descriptive statistics were carried out and presented using tables and texts. Bivariate and multivariable analysis was done in logistic regression to determine the association between factor variables and the dependent variable. Based on bivariate analysis, those variables having p-value < 0.25 in the binary logistic regression were transferred to the multivariable analysis, and those variables having P-value < 0.05 at 95% confidence level were considered as independent factors for mortality of preterm low birth weight neonates. The final measure of association between independent and dependent variables was expressed by the adjusted odds ratio.

## Results

Two hundred ninety- one preterm low birth neonates' charts were reviewed and each individual preterm low birth weight neonates had a different length of hospital stay.

### Neonatal and maternal socio-demographic characteristics

From the 291 total sampled preterm low birth weight neonates, the majority 185 (63.57%) were male. Two hundred five (70.45%) mothers were belonging to the age category of 20-34 years (Table 1).

Table 1.Socio-demographic characteristics of preterm low birth weight neonates and their mothers admitted in NICU of Amhara region referral hospitals, Ethiopia, 2019 ( $n=291$ ).

| Characteristics    | Category | Total N (%) | Alive N (%)  | Death N (%) |
|--------------------|----------|-------------|--------------|-------------|
|                    |          | N=291       | N=181        | N=110       |
| Sex of the neonate | Female   | 106( 36.43) | 70 ( 66.04 ) | 36( 33.96)  |
|                    | Male     | 185( 63.57) | 111(60)      | 74(40)      |

|                     |       |             |            |           |
|---------------------|-------|-------------|------------|-----------|
|                     | <20   | 46( 15.81)  | 29( 63.04) | 17(36.96) |
| Maternal age (year) | 20-34 | 205( 70.45) | 128(62.44) | 77(37.56) |
|                     | >=35  | 40(13.75)   | 24( 62.2)  | 16(37.8)  |

### Maternal and obstetrics related characteristics

The Majority of 45 (15.46%) preterm low birth weight neonates were born from mothers who had a diagnosis of pregnancy- induced hypertension (**Table 2**).

Table 2: Maternal medical and obstetrics characteristics of preterm low birth weight neonates and neonatal outcome admitted in NICU of Amhara region referral hospitals, Ethiopia, 2019 (n=291)

| Characteristics                         | Category                       | Total N (%) | AliveN(%)  | Death N(%)   |             |
|-----------------------------------------|--------------------------------|-------------|------------|--------------|-------------|
|                                         |                                | N=291       | N=181      | N=110        |             |
| <b>Maternal chronic Medical disease</b> | <b>HIV</b>                     | No          | 281(96.56) | 178 (63.35)  | 103(36.65 ) |
|                                         |                                | Yes         | 10(3.44)   | 3(30)        | 7(70)       |
|                                         | <b>DM</b>                      | No          | 285(97.94) | 179 (62.81)  | 106(37.19)  |
|                                         |                                | Yes         | 6(2.06)    | 2(33.33 )    | 4(66.67)    |
|                                         | <b>Others</b>                  | No          | 289(99.31) | 181 (62.63 ) | 108 (37.37) |
|                                         |                                | Yes         | 2(0.69)    | -            | 2(100)      |
|                                         | <b>Obstetric complications</b> | No          | 289(99.31) | 180(62.28 )  | 109( 37.72) |
|                                         |                                | Yes         | 2(0.69)    | 1(50)        | 1(50)       |
|                                         |                                | No          | 228(78.35) | 149(65.35 )  | 79 (34.65)  |
|                                         |                                | Yes         | 63(21.65)  | 32(50.79)    | 31(49.21)   |

|                               |                           |     |            |              |             |
|-------------------------------|---------------------------|-----|------------|--------------|-------------|
| <b>Obstetric complication</b> | <b>PIH</b>                | No  | 246(84.54) | 158(64.23)   | 88(35.77)   |
|                               |                           | Yes | 45(15.46)  | 23(51.11)    | 22(48.89)   |
|                               | <b>placenta-abruption</b> | No  | 279(95.88) | 175 (62.72 ) | 104( 37.28) |
|                               |                           | Yes | 12( 4.12)  | 6(50)        | 6(50)       |
|                               | <b>placenta-Previa</b>    | No  | 285(97.94) | 178(62.46 )  | 107(37.54)  |
|                               |                           | Yes | 12(2.06)   | 6(50)        | 6(50)       |

### Neonatal related characteristics

Two hundred seventy- three (93.81%) preterm low birth weight neonates were born in health institutions. The Majority (79.73%) of the preterm low birth weight neonates were born via the vaginal mode of delivery. Two hundred nineteen (80.22%) preterm low birth weight neonates had less than seven APGAR scores at the first minute. One hundred fifty- two (55.68%) preterm low birth weight neonates had more than seven APGAR score at five minutes (**Table.3**).

Table.3: Neonatal- related characteristics of preterm low birth weight neonates and neonatal outcome admitted in NICU of Amhara region referral hospitals, Ethiopia, 2019 (*n=291*).

| <b>characteristics</b>   | <b>Category</b>    | <b>Total N (%)</b> | <b>Alive N (%)</b> | <b>Death N (%)</b> |
|--------------------------|--------------------|--------------------|--------------------|--------------------|
|                          |                    | <b>N=291</b>       | <b>N=281</b>       | <b>N=110</b>       |
| <b>Place of delivery</b> | Health institution | 273(93.81)         | 171(62.64)         | 102(37.36)         |
|                          | Home               | 18(6.19)           | 10(55.56)          | 8(44.44 )          |
| <b>Mode of</b>           | Cesarean           | 59(20.27)          | 43(72.88)          | 16 (27.12)         |

|                                        |          |            |            |           |
|----------------------------------------|----------|------------|------------|-----------|
| <b>delivery</b>                        | Vaginal  | 232(79.73) | 138(59.48) | 94(40.52) |
| <b>Type of pregnancy</b>               | Single   | 185(63.57) | 118(63.78) | 67(36.22) |
|                                        | Multiple | 106(36.43) | 63(59.43)  | 43(40.57) |
| <b>APGAR score 1<sup>st</sup> min.</b> | <7       | 219(80.22) | 129(58.9)  | 190(41.1) |
|                                        | >=7      | 54(19.78)  | 42(77.78)  | 12(22.22) |
| <b>APGAR score 5<sup>th</sup> min.</b> | <7       | 121(44.32) | 65(53.72)  | 56(46.28) |
|                                        | >=7      | 152(55.68) | 106(69.74) | 46(30.26) |

## Morbidity and Mortality Pattern

### Preterm Low birth weight- related morbidities Pattern

In this study 219 (75.26%), 201(69.07%), 145(49.83%), 39(13.4%), 24(8.25%), and 21(7.22%) 10(3.44%), 23( 7.9%) and 7( 2.41%) of neonates were diagnosed with hypothermia, sepsis, RDS, jaundice, congenital anomaly, hypoglycemia, necrotizing enterocolitis, meningitis, and perinatal asphyxia morbidities respectively(**Table.4**).

Table.4:medical and surgical morbidity- related factors of preterm low birth weight neonates admitted in NICU of Amhara region referral hospitals, Ethiopia, 2019 (n=291).

| <b>Morbidity characteristics</b> | <b>Category</b> | <b>Total N(%)</b> | <b>Alive N(%)</b> | <b>Death N(%)</b> |
|----------------------------------|-----------------|-------------------|-------------------|-------------------|
|                                  |                 | <b>N=291</b>      | <b>N=181</b>      | <b>N=110</b>      |
| <b>Sepsis</b>                    | No              | 90(30.93)         | 69(76.67)         | 21(23.33)         |
|                                  | Yes             | 201( 69.07)       | 112(55.72)        | 89(44.28)         |

|                           |     |            |            |             |
|---------------------------|-----|------------|------------|-------------|
| <b>RDS</b>                | No  | 146(50.17) | 115(78.77) | 31(21.23)   |
|                           | Yes | 145(49.83) | 66 (45.52) | 79(54.48)   |
| <b>Jaundice</b>           | No  | 251(86.6)  | 159(63.10) | 93 (36.90)  |
|                           | Yes | 39(13.4)   | 22(56.41)  | 17(43.59)   |
| <b>Congenital anomaly</b> | No  | 267(91.75) | 170(63.67) | 97(36.33)   |
|                           | Yes | 24(8.25)   | 11(45.83)  | 13(54.17)   |
| <b>Hypoglycemia</b>       | No  | 270(92.78) | 172(63.7)  | 98(36.30)   |
|                           | Yes | 21(7.22)   | 9(42.86 )  | 12(57.14)   |
| <b>Hypothermia</b>        | No  | 72(24.74)  | 50(69.44)  | 22(30.56)   |
|                           | Yes | 219(75.26) | 131(59.82) | 88(40.18)   |
| <b>Perinatal asphyxia</b> | No  | 284(97.59) | 181(63.73) | 103( 36.27) |
|                           | Yes | 7( 2.41)   | -          | 7(100)      |
| <b>Meningitis</b>         | No  | 268(92.1)  | 167(62.31) | 101(37.69)  |
|                           | Yes | 23( 7.90)  | 14(60.87)  | 9(39.13)    |
| <b>Necrotizing enter</b>  | No  | 281(96.56) | 179 (63.7) | 102(36.3)   |
| <b>colitis</b>            | Yes | 10(3.44)   | 2(20)      | 8(80)       |

**Factors  
associat**

### **ed with mortality of preterm low birth weight neonates**

In this study, the overall proportion of preterm low birth weight neonatal mortality was 37.8 % (95%CI: 32.4-43.5). In this study Sepsis, RDS, congenital anomaly, and hypoglycemia have remained independent factors of mortality for preterm low birth weight neonates (Table.5).

In this study, preterm low birth weight neonates with sepsis had 6% higher odds of mortality as compared to neonates without sepsis (AOR: 2.06(95% CI :1.05-4.02). Preterm low birth weight neonates diagnosed with RDS had 3.28 times higher odds of mortality than preterm low birth weight neonates without RDS (AOR: 3.28 (95% CI: 1.81-5.95). Preterm low birth weight neonates with congenital anomaly had 3.14 times odds of mortality as compared to preterm low birth weight neonates without congenital abnormality (AOR: 3.14(95%CI:1.16-8.54). Preterm low birth weight neonates with a diagnosis of hypoglycemia had 81% higher odds of mortality than their counterparts (AOR 3.81(95%CI: 1.27-11.44).

Table.5: factors associated with mortality of preterm low birth weight neonates admitted in NICU of Amhara region referral hospitals, Ethiopia, 2019 ( $n=291$ ).

| Characteristics           | Category | Alive | Death | COR(95%CI)      | AOR(95% CI)      | P> z    |
|---------------------------|----------|-------|-------|-----------------|------------------|---------|
| <b>Sepsis</b>             | No       | 69    | 21    | 1               | 1                |         |
|                           | Yes      | 112   | 89    | 2.61(1.49-4.58) | 2.06(1.05-4.02)  | 0.035** |
| <b>RDS</b>                | No       | 115   | 31    | 1               | 1                |         |
|                           | Yes      | 66    | 79    | 4.44(2.66-7.42) | 3.28(1.81-5.95)  | 0.000** |
| <b>Congenital anomaly</b> | No       | 170   | 97    | 1               | 1                |         |
|                           | Yes      | 11    | 13    | 2.07(.89-4.81)  | 3.14(1.16-8.54)  | 0.025** |
| <b>Hypoglycemia</b>       | No       | 172   | 98    | 1               | 1                |         |
|                           | Yes      | 9     | 12    | 2.34(.95-5.75)  | 3.81(1.27-11.44) | 0.017** |
| <b>Hypothermia</b>        | No       | 50    | 22    | 1               | 1                |         |
|                           | Yes      | 131   | 88    | 1.53(.86-2.7)   | 1.34(.68-2.65)   | 0.401   |
| <b>PIH</b>                | No       | 158   | 88    | 1               | 1                |         |



|                                  |     |     |     |                 |                |       |
|----------------------------------|-----|-----|-----|-----------------|----------------|-------|
|                                  | Yes | 23  | 22  | 1.72(.91-3.26)  | 1.98(.92-4.25) | 0.081 |
| <b>APGAR 1<sup>st</sup> min.</b> | <7  | 129 | 190 | 2.44(1.22-4.9)  | 1.72(.72-4.13) | 0.228 |
|                                  | ≥7  | 42  | 12  | 1               | 1              |       |
| <b>APGAR 5<sup>th</sup> min</b>  | <7  | 65  | 56  | 1.99(1.21-3.26) | 1.24(.66-2.31) | 0.513 |
|                                  | ≥7  | 106 | 46  | 1               | 1              |       |

NB: \*\*=significant at p-value<0.05 in multivariable analysis, 1=considered as reference category

## Discussion

This retrospective follow-up study was carried out to determine a pattern of preterm LBW neonates' morbidity, mortality, and factors associated with their mortality. In this study, the overall proportion of preterm low birth weight neonatal mortality was 37.8 % (95%CI: 32.4-43.5). This result is higher than studies conducted in India at 6.5%(18) and Iran at 28.7%(20). The difference from a study in Iran might be that study excluded neonates with severe fetal malformations whereas this study did not exclude those neonates, which may increase mortality risk. The discrepancy from a study in India may be due to that the study focusing only on short-term outcomes, whereas our study was on the neonatal period.

However, this result is lower than the study conducted in Isfahan city, Iran 64.4 %(21) and Telangana, India 88.8%(22). The possible reason for this difference might be the difference in inclusion criteria, where a study in Iran involves neonates with a birth weight category of less than one thousand five hundred grams and gestational age of less than thirty weeks. The risk of mortality may become high as the birth weight and gestational age of neonate is decreased.

1  
2  
3 Our study was also revealed that neonatal hypothermia (75.26%), Sepsis (69.07%), RDS,  
4 (49.83%), jaundice, (13.4%), and congenital anomaly (8.25%) were the most common  
5  
6 morbidities and reason for admission to NICU. This result is supported by studies conducted in  
7  
8 Sharda hospital, India (16), Western Nepal(17), Telangana, India(18), Isfahan city, Iran(21),  
9  
10 teaching hospital, Telangana, India (22), New South Wales, and Australian Capital Territory(23).  
11  
12  
13

14  
15 In this study, preterm low birth weight neonates with sepsis had 6% higher odds of mortality as  
16  
17 compared to neonates without sepsis (AOR: 2.06(95% CI :1.05-4.02). This result was supported  
18  
19 by the study conducted in Telangana, India (18)New South Wales and Australian Capital  
20  
21 Territory (23), Mahatma Gandhi Memorial Government Hospital, India (24). The possible reason  
22  
23 might be that preterm low birth weight neonates mostly had immature host defense mechanisms  
24  
25 makes them susceptible to devastating infection that finally may lead to neonatal death.  
26  
27  
28  
29

30 In addition, Preterm low birth weight neonates diagnosed with RDS had 3.28 times higher odds  
31  
32 of mortality than preterm low birth weight neonates without RDS (AOR: 3.28 (95% CI: 1.81-  
33  
34 5.95). This result was supported by a study conducted in Aga Khan University Hospital, Karachi,  
35  
36 Pakistan(6), Telangana, India(18), New South Wales and Australian Capital Territory (23),  
37  
38 Mahatma Gandhi Memorial Government Hospital, India(24). The possible reason might be that  
39  
40 neonates with RDS had the complication of lung collapse that may facilitate death easily in  
41  
42 preterm low birth weight neonates.  
43  
44  
45  
46

47 Preterm low birth weight neonates with a diagnosis of hypoglycemia had 81% higher of odds of  
48  
49 mortality than their counterparts (AOR 3.81(95%CI: 1.27-11.44). This was supported by a study  
50  
51 done in Telangana, India (18), Mahatma Gandhi Memorial Government Hospital (24). This  
52  
53 might be due to the fact that preterm neonates had an immature organ that leads to failure in  
54  
55  
56  
57  
58  
59  
60

glycogen storage may end up with death. In addition, this study found that preterm low birth weight neonates with a diagnosis of congenital anomaly had 3.14 times higher odds of death as compared to their counterparts (AOR: 3.14(95%CI:1.16-8.54). This result is supported by other studies conducted in Telangana, Indi(6), Mahatma Gandhi Memorial Government Hospital, India(24). The possible reason might be preterm low birth neonates with congenital anomalies have the risk of developing different systemic complication like neurological, cardiovascular, respiratory, and gastrointestinal those can may leads to mortality.

## Conclusion

In conclusion, this study revealed that morbidity and mortality pattern of preterm low birth neonates were higher in this setting than national estimates of SDGs and findings of Ethiopian demographic health survey 2019. Hypothermia, Sepsis, RDS, jaundice, and congenital anomaly were the most common morbidities. Neonatal sepsis, respiratory distress, hypoglycemia, and congenital anomaly were independent factors of mortality among preterm low birth weight neonates.

## Abbreviations

DM: Diabetes Mellitus, FHRH: Felege Hiwot Referral Hospital, GA: Gestational Age, HIV: Human Immune Virus, LBW: Low Birth Weight, NEC: Necrotizing Enterocolitis, NICU: Neonatal Intensive Care Unit, PIH: Pregnancy Induced Hypertension, PTLBW: Preterm Low Birth Weight, RDS: Respiratory Distress

## Ethics approval and consent to participate

1  
2  
3 To conduct this study ethical clearance letter was obtained from the institutional review board of  
4 Mekelle University, college of health sciences with reference number 1270/2019. Permission  
5 letters were written for FHRH and Dessie referral hospital. Data were collected after consent of  
6  
7 cooperation was obtained from Felege Hiwot referral hospital and Dessie referral hospital  
8 administrator.  
9  
10  
11  
12  
13  
14

15 **Patient consent for publication:** Not required

16  
17 **Availability of data and materials:** The raw data file could be provided for research purposes  
18 only, upon request via e-mail of the corresponding author.  
19  
20  
21  
22

23 **Competing interests:** The authors declare that they have no competing interests.  
24  
25

26 **Funding:** There is no received specific grant from any funding agency  
27  
28

29 **Patient and public involvement:** Patients and/or the public were not involved in the design or  
30 conduct of this research. .  
31  
32  
33

### 34 **Authors' contributions**

35  
36  
37 All authors contributed equally to this work. YD, BF, MS \$ DT participated in all phases of the  
38 study including topic selection, design, data collection, data analysis, and interpretation. All  
39 authors also contribute to writing this manuscript. All authors read and approved the final  
40 manuscript.  
41  
42  
43  
44  
45  
46

### 47 **Acknowledgement**

48  
49 It is our pleasure to thank Felege Hiwot referral hospital and Dessie referral hospital staffs of  
50 pediatric, neonatology care team, and the card extractors. It is also our pleasure to thank the data  
51 collectors and supervisors.  
52  
53  
54  
55  
56

## Reference

1. WHO. Survive & thrive. Delic Living [Internet]. 2019;29(8):20–37. Available from: <https://apps.who.int/iris/bitstream/handle/10665/326495/9789241515887-eng.pdf>
2. Lau C, Ambalavanan N, Chakraborty H, Wingate MS, Carlo WA. Extremely low birth weight and infant mortality rates in the United States. *Pediatrics*. 2013;131(5):855–60.
3. Article O. Neonatal Morbidity and Mortality Pattern in a Tertiary Care Neonatal Unit of a Teaching Hospital. 2014;4:7–12.
4. Aah P, Thuvarakan P, Mvc DS. Classification of perinatal deaths according to ICD-PM : An audit on perinatal post-mortems in a tertiary care center in Sri Lanka. 2017;(June):31–5.
5. Hamid F, Quaium SMM, Rahman A, Ahmad AR, Khan S, Hussain T, et al. Audit of Neonatal Morbidity and Mortality in A Tertiary Care Hospital, Sylhet. *Chattagram Maa-O-Shishu Hosp Med Coll J*. 2017;15(2):45–8.
6. Khan MR, Maheshwari PK, Shamim H, Ahmed S, Ali SR. Morbidity pattern of sick hospitalized preterm infants in Karachi, Pakistan. *J Pak Med Assoc*. 2012;62(4):386–8.
7. Mengesha HG, Wuneh AD, Lerebo WT, Tekle TH. Survival of neonates and predictors of their mortality in Tigray region , Northern Ethiopia : prospective cohort study. *BMC Pregnancy Childbirth* [Internet]. 2016;(December). Available from: <http://dx.doi.org/10.1186/s12884-016-0994-9>

- 1  
2  
3 8. Kebede B, Gebeyehu A, Sharma HR, Yifru S. Prevalence and associated factors of  
4 neonatal mortality in North Gondar Zone, Northwest Ethiopia. *Ethiop J Heal Dev.*  
5  
6 2012;26(2):66–71.  
7
- 8  
9  
10  
11 9. Kassie A, Mekasha A, Tadesse BT, Worku A. Predictors of early neonatal m  
12  
13 ortality at a neonatal intensive care unit of a specialized refer  
14  
15 al teaching hospital in Ethiopia. 2012;(January).  
16
- 17  
18  
19 10. Mekonnen T, Tenu T, Aklilu T AT (2018). Assessment of Neonatal Death and Causes  
20  
21 among Admitted Neonates in Neonatal Intensive Care Unit of Mizan Tepi University  
22  
23 Teaching Hospital, Bench Maji Zone, South-West Ethiopia, 2018. *Clinics Mother Child*  
24  
25 *Healt.* 2018;15(4).  
26
- 27  
28  
29 11. Chidiebere ODI, Uchenna E, Christian I, Nwabueze AI, Stephen AO, Ifeyinwa O. The  
30  
31 Low-birth weight Infants: Pattern of Morbidity and Mortality in a Tertiary Healthcare  
32  
33 Facility in the South Eastern Nigeria. *Ann Med Health Sci Res* [Internet].  
34  
35 2018;8(April):4–10. Available from: <https://www.amhsr.org/>  
36
- 37  
38  
39 12. Janaswamy VS, Kodandapani Y, Lathasree P. Mortality and Morbidity Profile of Low  
40  
41 Birth Weight Babies at a Tertiary Care Hospital. *IOSR J Dent Med Sci Ver I* [Internet].  
42  
43 2016;15(3):2279–861. Available from: [www.iosrjournals.org](http://www.iosrjournals.org)  
44
- 45  
46  
47 13. Mukherjee S, Shaw SC, Devgan A, Srivastava AK, Mallige A. Survival and morbidities in  
48  
49 very low birth weight (VLBW) infants in a tertiary care teaching hospital. *Int J Contemp*  
50  
51 *Pediatr.* 2017;4(6):2170.  
52
- 53  
54  
55 14. Arakhita Swain NN. [Http://Www.Omicsgroup.Org/Journals/Pulmonary-Agenesis-With-](http://Www.Omicsgroup.Org/Journals/Pulmonary-Agenesis-With-)  
56

- 1  
2  
3 Dextrocardia-and-Hypertrophic-Cardiomyopathy-First-Case-Report-2167-  
4 0897.1000141.Php?Aid=26283. J Neonatal Biol. 2014;03(03).  
5  
6  
7  
8  
9 15. Baki MA, Haque A, Mohsin F, Nahar J, Akhter S, Begum T, et al. Risk Factors for  
10 Mortality in Neonates with Birth Weight <1500 gm. BIRDEM Med J. 2012;2(1):19–22.  
11  
12  
13  
14 16. Hassan N, Mukhopadhyay S, Mohan S. Morbidity and mortality profile of preterm  
15 neonates admitted in neonatal intensive care unit of a tertiary care centre in Western Uttar  
16 Pradesh, India. Int J Contemp Pediatr. 2019;6(5):1859.  
17  
18  
19  
20  
21  
22 17. Paudel L, Kalakheti B, Sharma K. Prevalence and Outcome of Preterm Neonates  
23 Admitted to Neonatal Unit of a Tertiary Care Center in Western Nepal. Journal of  
24 Lumbini Medical College. 2018;6(2):6 pages. DOI: 10.22502/jlmc.v6i2.218. Epub: 2018  
25 Dec 8.  
26  
27  
28  
29  
30  
31  
32 18. Hasthi UR, Ashwani N, Kumar CS, Chejeti SR. Morbidity and Mortality Patterns in Small  
33 for Gestational Age versus Appropriate for Gestational Age Preterm Neonates Admitted  
34 in Level II Neonatal Intensive Care Unit : A Observational Study. 2017;4(10):133–6.  
35  
36  
37  
38  
39  
40 19. (EWE Child. The global strategy for women’s children’s and adolescents’ health (2016-  
41 2030):. I at glance . 2015. ). STRATEGY. 2016;  
42  
43  
44  
45 20. von Elm E, et al., The Strengthening the Reporting of Observational Studies in  
46 Epidemiology (STROBE) Statement: guidelines for reporting observational studies.  
47  
48  
49  
50 20. Ghorbani F, Heidarzadeh M, Dastgiri S, Ghazi M, Farshi MR. Survival of Premature and  
51 Low Birth Weight Infants : A Multicenter , Prospective , Cohort Study in Iran. 2017;8(1).  
52  
53  
54  
55  
56  
57  
58  
59  
60

- 1  
2  
3  
4  
5  
6  
7  
8  
9  
10  
11  
12  
13  
14  
15  
16  
17  
18  
19  
20  
21  
22  
23  
24  
25  
26  
27  
28  
29  
30  
31  
32  
33  
34  
35  
36  
37  
38  
39  
40  
41  
42  
43  
44  
45  
46  
47  
48  
49  
50  
51  
52  
53  
54  
55  
56  
57  
58  
59  
60
21. Navaei F, Aliabady B, Moghtaderi J, Moghtaderi M, Kelishadi R. Early outcome of preterm infants with birth weight of 1500 g or less and gestational age of 30 weeks or less in Isfahan city, Iran. 2010;6(3).
  22. Pabbati J, Subramanian P, Renikuntla M. Morbidity and mortality of low birth weight babies in early neonatal period in a rural area teaching hospital, Telangana, India. *Int J Contemp Pediatr*. 2019;6(4):1582.
  23. Schindler T, Koller-smith L, Lui K, Bajuk B, Bolisetty S. Causes of death in very preterm infants cared for in neonatal intensive care units : a population-based retrospective cohort study. 2017;1–9.
  24. Saminathan D, Mythili B, Ramesh E, Zacharias AM. Incidence , Mortality Pattern , and Outcome of Low Birth Weight Babies Admitted in a Rural Tertiary Care Center : A Retrospective Study. 2016;4(1):51–4.



1  
2  
3  
4  
5  
6  
7  
8  
9  
10  
11  
12  
13  
14  
15  
16  
17  
18  
19  
20  
21  
22  
23  
24  
25  
26  
27  
28  
29  
30  
31  
32  
33  
34  
35  
36  
37  
38  
39  
40  
41  
42  
43  
44  
45  
46  
47  
48  
49  
50  
51  
52  
53  
54  
55  
56  
57  
58  
59  
60

For peer review only

# BMJ Open

## MORBIDITY AND MORTALITY PATTERN OF PRETERM LOW BIRTH WEIGHT NEONATES ADMITTED TO REFERRAL HOSPITALS IN THE AMHARA REGION OF ETHIOPIA: RETROSPECTIVE FOLLOWUP STUDY

|                                 |                                                                                                                                                                                                                           |
|---------------------------------|---------------------------------------------------------------------------------------------------------------------------------------------------------------------------------------------------------------------------|
| Journal:                        | <i>BMJ Open</i>                                                                                                                                                                                                           |
| Manuscript ID                   | bmjopen-2021-054574.R1                                                                                                                                                                                                    |
| Article Type:                   | Original research                                                                                                                                                                                                         |
| Date Submitted by the Author:   | 21-Feb-2022                                                                                                                                                                                                               |
| Complete List of Authors:       | Genie, Yalemtehay; Mizan-Tepi University, Department of nursing<br>Kebede, Belete; Jimma University<br>Silesh, Mulualem ; Debre Berhan University, Department of midwifery<br>Tilahun, Desalew; Jimma University, Nursing |
| <b>Primary Subject Heading</b>: | Paediatrics                                                                                                                                                                                                               |
| Secondary Subject Heading:      | Paediatrics, Intensive care, Nursing                                                                                                                                                                                      |
| Keywords:                       | Paediatric clinical genetics & dysmorphology < GENETICS, Neonatal intensive & critical care < INTENSIVE & CRITICAL CARE, NEONATOLOGY, Paediatric intensive & critical care < ANAESTHETICS                                 |
|                                 |                                                                                                                                                                                                                           |

SCHOLARONE™  
Manuscripts



I, the Submitting Author has the right to grant and does grant on behalf of all authors of the Work (as defined in the below author licence), an exclusive licence and/or a non-exclusive licence for contributions from authors who are: i) UK Crown employees; ii) where BMJ has agreed a CC-BY licence shall apply, and/or iii) in accordance with the terms applicable for US Federal Government officers or employees acting as part of their official duties; on a worldwide, perpetual, irrevocable, royalty-free basis to BMJ Publishing Group Ltd ("BMJ") its licensees and where the relevant Journal is co-owned by BMJ to the co-owners of the Journal, to publish the Work in this journal and any other BMJ products and to exploit all rights, as set out in our [licence](#).

The Submitting Author accepts and understands that any supply made under these terms is made by BMJ to the Submitting Author unless you are acting as an employee on behalf of your employer or a postgraduate student of an affiliated institution which is paying any applicable article publishing charge ("APC") for Open Access articles. Where the Submitting Author wishes to make the Work available on an Open Access basis (and intends to pay the relevant APC), the terms of reuse of such Open Access shall be governed by a Creative Commons licence – details of these licences and which [Creative Commons](#) licence will apply to this Work are set out in our licence referred to above.

Other than as permitted in any relevant BMJ Author's Self Archiving Policies, I confirm this Work has not been accepted for publication elsewhere, is not being considered for publication elsewhere and does not duplicate material already published. I confirm all authors consent to publication of this Work and authorise the granting of this licence.

1  
2  
3 **MORBIDITY AND MORTALITY PATTERN OF PRETERM LOW BIRTH WEIGHT**  
4 **NEONATES ADMITTED TO REFERRAL HOSPITALS IN THE AMHARA REGION**  
5 **OF ETHIOPIA: RETROSPECTIVE FOLLOWUP STUDY**  
6  
7  
8  
9

10 Yalemtehay Dagnaw Genie<sup>1\*</sup>, Belete Fenta Kebede<sup>2</sup>, Mulualem Silesh Zerihun<sup>3</sup>, Desalew  
11  
12  
13 Tilahun Beyene<sup>4</sup>  
14  
15

16 **Affiliation**  
17  
18

19 <sup>1</sup>Department of nursing, MizanTepi University, Ethiopia  
20  
21

22 <sup>2</sup>School of midwifery, Jimma University, Ethiopia  
23  
24

25 <sup>3</sup>Department of midwifery, Debre Birhan University, Ethiopia  
26  
27

28 <sup>4</sup>Department of Nursing, Jimma University, Ethiopia  
29  
30  
31

32 **Author address**  
33

34 Yalemtehay Dagnaw: Gmail -tsehayworld@gmail.com  
35

36 Belete Fenta: Gmail -belete121wy@gmail.com  
37

38 Mulualem Silesh: Gmail-sileshmulualem22@gmail.com  
39

40 Desalew Tilahun; Gmail- [desalewtilahun34@gmail.com](mailto:desalewtilahun34@gmail.com)  
41

42 \* Corresponding author  
43

44 Yalemtehay Dagnaw  
45  
46

47 Department of nursing, MizanTepi University, Ethiopia  
48  
49

50 E-mail address: [tsehayworld@gmail.com](mailto:tsehayworld@gmail.com)  
51  
52

53 **Word count=3429**  
54  
55

## Abstract

**Objective:** This study aimed to assess the morbidity and mortality patterns of preterm neonates with low birthweight admitted in the Amhara region referral hospitals in Ethiopia.

**Design:** Hospital-based retrospective follow-up study

**Setting:** Amhara region referral hospitals, Ethiopia

**Participants:** : A total of 291 preterm neonates low birth weight were admitted to referral hospitals in the Amhara region between January 1 /2017 and December 30/2018 were reviewed.

Data were entered into Epi-data 4.4.2.1 and exported to STATA 14 for analysis and variables with a p-value of <0.05 at 95% confidence level in multivariable logistic regression model analysis were declared as statistically significant associated factors of mortality.

**Primary outcome:** Morbidity and mortality patterns in preterm low birth weight neonates

**Results:** This study revealed that 37.8% (95%CI: 32.4-43.5) of preterm low-birthweight neonates died. The most common morbidities found were 219 (75.26%) hypothermia, followed by 201(69.07%), 145(49.83%), 39(13.4%) and 24(8.25%) with sepsis, respiratory distress, jaundice and congenital anomalies respectively. Sepsis (AOR: 2.0;(95% CI:1.03-3.89), respiratory distress (AOR: 4.6; (95% CI: 2.51-8.40), hypoglycemia (AOR 3.91; (95%CI: 1.09-10.52), APGAR score at fifth minute <7 (AOR 0.39; (95%CI: (.18-.82) and duration of hospital stay below mean (<9.82 days) (AOR 0.17; (95%CI: 0.09-0.33 ) were associated with mortality.

**Conclusion:** The mortality rate of preterm low birthweight neonates was high, indicating that this is a public health issue. Hypothermia, sepsis, respiratory distress, jaundice, and congenital anomalies were the common morbidities. Sepsis, respiratory distress, hypoglycemia, Apgar

1  
2  
3 score at fifth minute <7 and duration of hospital stay below the mean were independent factors  
4 of mortality. However, need to be further investigated in future research and appropriately  
5 addressed using prospective follow-up.  
6  
7  
8

9  
10 **Keywords:** morbidity, mortality, pattern, preterm low birth weight, Amhara region, Ethiopia  
11

## 12 13 **Article summary**

### 14 15 **Strength and limitation of the study**

- 16  
17  
18  
19     ▪ The study was conducted at multiple referral hospitals, which increased the  
20         generalizability of the findings to the entire population.
- 21  
22  
23     ▪ This study used a multivariate logistic regression analysis to regulate all likely  
24         confounders.
- 25  
26  
27  
28     ▪ Data were collected from secondary sources and some factors were not available in the  
29         patients' medical charts, thereby creating the potential for missing factors that might have  
30         a significant association with death.  
31  
32  
33  
34  
35  
36  
37  
38  
39  
40  
41  
42  
43  
44  
45  
46  
47  
48  
49  
50  
51  
52  
53  
54  
55  
56  
57  
58  
59  
60

## Introduction

Globally, in 2017 there were about 5.4 million cases of mortality under the age of five, out of which 2.5 million died in the first 28 days, with approximately two-thirds and 80% of the neonates being delivered with preterm and low birthweight (LBW), respectively(1). The increasing number of preterm LBW neonates was one of the leading contributors to the leveling off of infants and neonatal mortality rates in 2013 in the United States of America (2). In many Asian and African countries, being born preterm LBW is the main risk factor for the development of various morbidities and neonatal mortality (3,4). In Sri Lanka, approximately 28% of neonates die because of LBW and prematurity (4).

Preterm LBW-related morbidities were the main causes of admission to the neonatal intensive care unit (NICU). In Bangladesh, 12.4% of admissions were due to preterm LBW and which was the cause of 6.5% of deaths (5). Furthermore, preterm LBW leads to prolonged hospital stay in neonates and can lead to adverse neurodevelopmental outcomes, with massive implications for the family and society in the future (6). In different regions of Ethiopia, preterm LBW is the major contributor to neonatal death, and neonates born both LBW and preterm show higher mortality rates during the neonatal period than those with normal birth weight and term neonates(7,8)(9)(10). Of all the neonatal deaths in the southwestern region of Ethiopia (22.8%), more than two-thirds of these (76%) were caused by LBW and prematurity (10).

Despite the introduction of modern techniques in NICU facilities, preterm LBW neonates are still at a high risk of developing numerous morbidities (11). The overall mortality of preterm neonates with LBW varies depending on the pattern of morbidities (12). Preterm neonates with LBW are predisposed to infectious diseases because of their immature immune system and

1  
2  
3 develop severe morbidities such as hypoglycemia, respiratory distress syndrome (RDS) (13),  
4 sepsis, jaundice, apnea, and birth asphyxia(14,15). The mortality rate of preterm LBW  
5 neonates differs depending on the type of morbidity (16,17). The risk of developing morbidities  
6 varied among different categories of preterm LBW neonates. Extremely low birth weight  
7 (ELBW) and extremely preterm neonates have higher rates of morbidity and mortality(18).

8  
9  
10  
11  
12  
13  
14  
15  
16 Currently, some trials aim to implement novel techniques for the prevention of preterm LBW  
17 births and to reduce neonatal morbidity and mortality related to preterm LBW. The United  
18 Nations sustainable development goal 3 emphasizes reducing neonatal deaths with the goal of  
19 reaching 12 or fewer neonatal deaths per 1000 live births per country by 2030. They aim to  
20 achieve this through different interventions including kangaroo mother care and extra support for  
21 feeding LBW and preterm babies with breast milk as well as other interventions during the  
22 postnatal period (19).

23  
24  
25  
26  
27  
28  
29  
30  
31  
32 Despite these trials, many previous studies in Ethiopia have identified a high prevalence of  
33 preterm LBW neonates and a higher risk of neonatal morbidity and mortality in preterm LBW  
34 neonates. Although the prevalence of preterm LBW births is high, there is an information gap  
35 regarding the pattern of morbidity and mortality in preterm LBW neonates and the factors  
36 associated with mortality in this study area. Therefore, this study aimed to assess the morbidity  
37 and mortality pattern of preterm LBW neonates admitted to referral hospitals in the Amhara  
38 region of Ethiopia to fill this information gap. The findings of this study will help to identify  
39 major morbidities and understand the causes of mortality in preterm LBW neonates and facilitate  
40 healthcare providers in the application of prevention strategies for any modifiable causes of  
41 morbidity and mortality. Furthermore, referral hospitals in the Amhara region will provide an



1  
2  
3 advanced insight into the factors associated with preterm LBW neonatal mortality. Finally, this  
4  
5 study will provide insights for future research that is needed along this line.  
6  
7

## 8 9 **Methods and materials**

### 10 11 12 **Study design, area, and period**

13  
14  
15 An institution-based retrospective follow-up study was conducted among preterm LBW neonates  
16  
17 admitted to the NICU ward in selected referral hospitals of Amhara region between January 1,  
18  
19 2017 and December 30, 2018. There are four referral hospitals in the region, (Bahirdar,  
20  
21 Debremarkos, Dessie and Debrebirhan Referral Hospitals), out of which, two of them were  
22  
23 selected by lottery method (Bahirdar, Felege Hiwot Referral Hospital (FHRH). This study was  
24  
25 conducted between January 1/ 2019 and February 1/2019(data collection period)  
26  
27  
28  
29

### 30 31 **Population, eligibility criteria**

32  
33 All neonates with a gestational age of less than 37 weeks weighing 500-2499 g admitted to the  
34  
35 NICU wards of the Amhara region referral hospitals were the source population. All selected  
36  
37 preterm LBW neonates admitted to the referral hospitals of the NICU ward from January 1/ 2017  
38  
39 to December 30 /2018 were included in the study. Live birth neonates with a gestational age of  
40  
41 less than 37 weeks weighing 500-2499 g admitted to the NICU wards of the Amhara region  
42  
43 referral hospitals were eligible for the study.  
44  
45  
46  
47

### 48 49 **Sampling techniques and procedure**

50  
51 The samples were allocated proportionally to each hospital. All preterm LBW neonates admitted  
52  
53 to the NICU ward between January 1/ 2017 and December 30 /2018 were recruited using the  
54  
55

admission registration book by recording their medical record numbers sequentially. A simple random sampling was used to select the required number of participants.

### Sample size determination

The sample size was determined by using a single population proportion formula considering the following assumptions; 95% confidence level, margin of error (0.05) and the rate of preterm mortality 25.2% from previous study conducted in Gondar, Ethiopia(20)

$$n = \frac{(Z_{\alpha/2})^2 \times p(1-p)}{(d)^2}$$

$$n = \frac{(1.96)^2 \times 0.252 \times 0.748}{(0.05)^2} = 289.65 \sim 290$$

The sample size after adding a 10% non-response rate was 319

### Variables of the study

The dependent variable was the outcome of preterm LBW neonates dichotomized as deceased or alive.

The independent variables of this study were as follows:

**-Socio-demographic variables** :( sex, age, age of mother, and duration of hospital stay)

**-Maternal and obstetric variables:** (maternal chronic diseases (HIV, DM), pregnancy status, pregnancy related complications (pregnancy-induced hypertension)

**- Neonatal complication/morbidity variables:** (sepsis, necrotizing enter-colitis, asphyxia, RDS, jaundice, pulmonary hemorrhage, congenital anomalies, hypothermia, hypoglycemia) and neonatal related variables (place of delivery, mode of delivery).

## Operational definitions

**Pattern:** frequent/repeated ways in which morbidity and mortality occur or wide spread incidence of morbidity and mortality

**Morbidity:** was defined as the diagnosis identified by health professionals using clinical, laboratory or other investigation methods (RDS, Sepsis, congenital anomalies, asphyxia, jaundice, pulmonary hemorrhage, necrotizing enter colitis, hypoglycemia and hypothermia) which were recorded in the neonate's medical chart

**Mortality:** was defined as death in the NICU before discharge as certified by the death certificate (death summary note) in the chart

Preterm low birth weight: neonates with a gestational age of less than 37 weeks and weighing less than 2500 g

## Data collection tools and procedures

After reviewing the literature, an existing checklist was adapted to address the objectives of the study. The checklist consists of information on maternal and neonatal socio-demographic data, neonatal-related factors, complication/morbidity factors, and maternal and obstetric-related factors. Data were extracted from each neonatal medical chart by using the resulting structured checklist.

## Data quality assurance

Different measures were taken to ensure the data quality. One day of training was provided to the data collectors and supervisors on the objective of the study and how to gather information

1  
2  
3 using the prepared data extraction checklist. The data collectors included were six nurses  
4  
5 working in the NICU who had NICU training. An MSc nurse supervisor was assigned to support  
6  
7 and facilitate data collection at each selected data collection site. The supervisor supervised the  
8  
9 data collectors throughout the data collection process. The supervisor conducted daily  
10  
11 evaluations of the checklists' completeness.  
12  
13

### 14 15 **Data processing, analysis, and presentation**

16  
17 After checking for completeness and consistency, the collected data were coded and entered into  
18  
19 the Epi-data statistical software package version 4.4.2.1. The data were then exported to STATA  
20  
21 version 14 for cleaning and analysis. Descriptive statistics performed and were presented in the  
22  
23 tables. Bivariate and multivariate analyses were conducted using logistic regression to determine  
24  
25 the association between factors and dependent variables. Based on the bivariate analysis, those  
26  
27 variables with a p-value < 0.25 in the binary logistic regression were transferred to the  
28  
29 multivariate analysis, and those variables with a P-value < 0.05 at 95% confidence level were  
30  
31 considered independent factors for the mortality of preterm LBW neonates. The final measure of  
32  
33 the association between independent and dependent variables was expressed as the adjusted odds  
34  
35 ratio (AOR).  
36  
37  
38  
39  
40  
41

### 42 **Patient and public involvement**

43  
44 The study participants were not involved in the development of the research question or design,  
45  
46 conduct, reporting, implementation or dissemination plans and evaluation.  
47  
48

### 49 **Results**

Out of 319 preterm LBW neonates medical chart reviewed, 28(8.8%) medical charts were excluded due to since 20 charts were not available at the time of data collection and 8 of them were incomplete medical charts. The remaining 291 preterm LBW neonates were included in the analysis making response rate of 91.2%.

### Neonatal and maternal socio-demographic characteristics

Of the 291 total sampled neonates, the majority (n=185; 63.57%) were male. The mothers of 205 (70.45%) of the neonates belonged to the age category of 20-34 years. Most of the participants (60.1%) had Length of Stay more than nine days in NICU (**Table 1**).

**Table 1: Socio-demographic characteristics of preterm low birth weight neonates and their mothers admitted to NICU in Amhara region referral hospitals, Ethiopia, 2019 (n=291).**

| Characteristics                    | Category  | Total N (%)<br>N=291 | Alive N (%)<br>N=181 | Death N (%)<br>N=110 | p-value |
|------------------------------------|-----------|----------------------|----------------------|----------------------|---------|
| Sex of the neonate                 | Female    | 106(36.43)           | 70 (66.04 )          | 36(33.96)            | 0.307   |
|                                    | Male      | 185(63.57)           | 111(60)              | 74(40)               |         |
| Maternal age (years)               | <20       | 46(15.81)            | 29(63.04)            | 17(36.96)            | 0.778   |
|                                    | 20-34     | 205(70.45)           | 128(62.44)           | 77(37.56)            |         |
|                                    | >=35      | 40(13.75)            | 24(62.2)             | 16(37.8)             |         |
| Neonatal age at admission          | <24 hours | 186(63.9)            | 116(62.4)            | 70(37.6)             |         |
|                                    | 1-7 day   | 99(34)               | 60(60.6)             | 39(39.4)             |         |
|                                    | >7day     | 6(2.1)               | 5(83.3)              | 1(16.7)              |         |
| Mean Length of Stay in NICU (days) | <9.82     | 116(39.9)            | 95(81.9)             | 21(18.1)             | 0.00    |
|                                    | ≥9.82     | 175(60.1)            | 86(49.1)             | 89(50.9)             |         |

## Maternal and obstetrics related characteristics

The majority (n=45; 15.46%) of preterm low birth weight neonates were born to mothers who had a diagnosis with pregnancy-induced hypertension (**Table 2**).

Table 2: Maternal medical and obstetrics characteristics of preterm low birth weight neonates and neonatal outcome admitted to NICU in Amhara region referral hospitals, Ethiopia, 2019 (n=291).

| Characteristics                  |                    | Category | Total N (%)<br>N=291 | Alive N(%)<br>N=181 | Death N (%)<br>N=110 | p-value |
|----------------------------------|--------------------|----------|----------------------|---------------------|----------------------|---------|
| Maternal chronic Medical disease |                    | No       | 281(96.56)           | 178 (63.35)         | 103(36.65 )          |         |
|                                  |                    | Yes      | 10(3.44)             | 3(30)               | 7(70)                |         |
| Maternal chronic Medical disease | HIV                | No       | 285(97.94)           | <b>179(62.81)</b>   | 106(37.19)           |         |
|                                  |                    | Yes      | 6(2.06)              | 2(33.33)            | 4(66.67)             |         |
|                                  | DM                 | No       | 289(99.31)           | 181(62.63)          | 108 (37.37)          |         |
|                                  |                    | Yes      | 2(0.69)              | -                   | 2(100)               |         |
|                                  | Others             | No       | 289(99.31)           | 180(62.28)          | 109( 37.72)          |         |
|                                  |                    | Yes      | 2(0.69)              | 1(50)               | 1(50)                |         |
| Obstetric complications          |                    | No       | 228(78.35)           | 149(65.35)          | 79 (34.65)           | 0.036   |
|                                  |                    | Yes      | 63(21.65)            | 32(50.79)           | 31(49.21)            |         |
| Obstetric complication           | PIH                | No       | 246(84.54)           | 158(64.23)          | 88(35.77)            | 0.095   |
|                                  |                    | Yes      | 45(15.46)            | 23(51.11)           | 22(48.89)            |         |
|                                  | placenta-abruption | No       | 279(95.88)           | 175 (62.72)         | 104( 37.28)          | 0.37    |
|                                  |                    | Yes      | <b>12(4.12)</b>      | 6(50)               | 6(50)                |         |
|                                  | placenta-Previa    | No       | 285(97.94)           | 178(62.46)          | 107(37.54)           | 0.533   |
|                                  |                    | Yes      | 12(2.06)             | 6(50)               | 6(50)                |         |

## Neonatal characteristics

The vast majority (n=273; 93.81%) of preterm LBW neonates were born in healthcare institutions. The majority (79.73%) of these were born via vaginal delivery. Two hundred nineteen (80.22%) preterm low birth weight neonates had a 1-minute Apgar score of <seven. A hundred fifty-two (55.68%) preterm low birth weight neonates a 5-minute APGAR score of greater than seven (**Table 3**).

**Table 3: Neonatal characteristics of preterm low birth weight neonates and neonatal outcome admitted to NICU in Amhara region referral hospitals, Ethiopia, 2019 (n=291).**

| characteristics                       | Category           | Total N (%)<br>N=291 | Alive N (%)<br>N=181 | Death N (%)<br>N=110 | p-value |
|---------------------------------------|--------------------|----------------------|----------------------|----------------------|---------|
| Place of delivery                     | Health institution | 273(93.81)           | 171(62.64)           | 102(37.36)           | 0.55    |
|                                       | Home               | 18(6.19)             | 10(55.56)            | 8(44.44)             |         |
| Mode of delivery                      | Cesarean           | 59(20.27)            | 43(72.88)            | 16 (27.12)           | 0.6     |
|                                       | Vaginal            | 232(79.73)           | 138(59.48)           | 94(40.52)            |         |
| Type of pregnancy                     | Single             | 185(63.57)           | 118(63.78)           | 67(36.22)            |         |
|                                       | Multiple           | 106(36.43)           | 63(59.43)            | 43(40.57)            |         |
| APGAR score<br>1 <sup>st</sup> minute | <7                 | 135(53.6)            | 90(66.67)            | 45(33.33)            | 0.144   |
|                                       | >=7                | 156(46.4)            | 91(58.33)            | 65(41.67)            |         |
| APGAR score<br>5 <sup>th</sup> min.   | <7                 | 220(75.6)            | 149(67.73)           | 71(32.27)            | 0.001   |
|                                       | >=7                | 71(24.4)             | 32(45.07)            | 39(54.93)            |         |

### Morbidity and Mortality Pattern of preterm LBW neonates

#### Morbidity distribution

In this study 219 (75.26%), 201(69.07%), 145(49.83%), 39(13.4%), 24(8.25%), and 21(7.22%) 10(3.44%), 23(7.9%) and seven (2.41%) neonates were diagnosed with hypothermia, sepsis, RDS, jaundice, congenital anomaly, hypoglycemia, necrotizing enter colitis, meningitis, and perinatal asphyxia, respectively. Most participants who had a diagnosis with sepsis (44.28%), RDS (54.48%) hypothermia (40.18%) and hypoglycemia (57.14%) were died (**Table4**).

**Table 4: overall morbidity characteristics of preterm low birth weight neonates admitted to NICU in Amhara region referral hospitals, Ethiopia, 2019 (n=291).**

| Morbidity characteristics | Category | Total N (%)<br>N=291 | Alive N (%)<br>N=181 | Death N(%)<br>N=110 | p-value |
|---------------------------|----------|----------------------|----------------------|---------------------|---------|
| Sepsis                    | No       | 90(30.93)            | 69(76.67)            | 21(23.33)           | 0.001   |

|                                                                                                         |     |             |            |            |       |
|---------------------------------------------------------------------------------------------------------|-----|-------------|------------|------------|-------|
|                                                                                                         | Yes | 201( 69.07) | 112(55.72) | 89(44.28)  |       |
| RDS                                                                                                     | No  | 146(50.17)  | 115(78.77) | 31(21.23)  | 0.000 |
|                                                                                                         | Yes | 145(49.83)  | 66 (45.52) | 79(54.48)  |       |
| Jaundice                                                                                                | No  | 251(86.6)   | 159(63.10) | 93(36.90)  | 0.424 |
|                                                                                                         | Yes | 39(13.4)    | 22(56.41)  | 17(43.59)  |       |
| Congenital anomaly                                                                                      | No  | 267(91.75)  | 170(63.67) | 97(36.33)  | 0.09  |
|                                                                                                         | Yes | 24(8.25)    | 11(45.83)  | 13(54.17)  |       |
| Hypoglycemia                                                                                            | No  | 270(92.78)  | 172(63.7)  | 98(36.30)  | 0.064 |
|                                                                                                         | Yes | 21(7.22)    | 9(42.86 )  | 12(57.14)  |       |
| Hypothermia                                                                                             | No  | 72(24.74)   | 50(69.44)  | 22(30.56)  | 0.145 |
|                                                                                                         | Yes | 219(75.26)  | 131(59.82) | 88(40.18)  |       |
| Perinatal asphyxia                                                                                      | No  | 284(97.59)  | 181(63.73) | 103(36.27) |       |
|                                                                                                         | Yes | 7( 2.41)    | -          | 7(100)     |       |
| Meningitis                                                                                              | No  | 268(92.1)   | 167(62.31) | 101(37.69) | 0.891 |
|                                                                                                         | Yes | 23(7.90)    | 14(60.87)  | 9(39.13)   |       |
| Others*                                                                                                 | No  | 281(96.56)  | 179 (63.7) | 102(36.3)  |       |
|                                                                                                         | Yes | 10(3.44)    | 2(20)      | 8(80)      |       |
| Others*=including neonatal enterocolitis ,meconium aspiration syndrome, anemia and pulmonary hemorrhage |     |             |            |            |       |

### Morbidity distribution with maternal and neonatal characteristics

In this study , sepsis was **observed** in 75.7%, 76.1%, 60.0%, 71.7%,71.2% and 74.6% of the male neonates, neonates born from mothers aged <20 years, neonates born from mothers with chronic medical disease, neonates born from mothers with obstetric complications, neonates born with APGAR score of 1<sup>st</sup> min <7 and APGAR score of 5<sup>th</sup> min <7 in NICU respectively . Respiratory distress syndrome was found on approximately 74.2% of the ELBW neonates in NICU. Similarly, Respiratory distress syndrome observed approximately in 50.3%, 55.0% and 80.0% of the male neonates, neonates born from mothers aged  $\geq 35$  years and neonates born from mothers with chronic medical disease respectively among preterm LBW neonates (**Table 5**).

Table 5:Morbidity distribution of preterm low birth weight neonates admitted in NICU of Amhara region referral hospitals, Ethiopia, 2019 (n=291)

| Characteristics | Category | Morbidities |     |          |              |             |
|-----------------|----------|-------------|-----|----------|--------------|-------------|
|                 |          | Sepsis      | RDS | Jaundice | Hypoglycemia | Hypothermia |



|                            |                    |       |       |       |       |       |       |
|----------------------------|--------------------|-------|-------|-------|-------|-------|-------|
| Sex of neonate             | Female             | 57.5% | 49.1% | 14.2% | 5.7%  | 78.3% | 6.6%  |
|                            | Male               | 75.7% | 50.3% | 13.0% | 8.1%  | 73.5% | 8.6%  |
| Maternal age (year)        | <20                | 76.1% | 54.3% | 6.5%  | 4.3%  | 76.1% | 15.2% |
|                            | 20-34              | 67.3% | 47.8% | 15.1% | 8.3%  | 73.7% | 5.4%  |
|                            | >=35               | 70.0% | 55.0% | 12.5% | 5.0%  | 82.5% | 12.5% |
| Maternal chronic Disease   | No                 | 69.4% | 48.8% | 13.9% | 7.1%  | 75.1% | 8.2%  |
|                            | Yes                | 60.0% | 80.0% |       | 10.0% | 80.0% |       |
| mode of delivery           | C/s                | 62.7% | 45.8% | 13.6% | 3.4%  | 72.9% | 10.2% |
|                            | vaginal            | 70.7% | 50.9% | 13.4% | 8.2%  | 75.9% | 7.3%  |
| Obstetric complications    | No                 | 66.7% | 46.9% | 14.0% | 7.5%  | 74.6% | 8.3%  |
|                            | Yes                | 77.8% | 60.3% | 11.1% | 6.3%  | 77.8% | 6.3%  |
| PIH                        | No                 | 67.9% | 48.4% | 14.2% | 6.9%  | 73.6% | 8.9%  |
|                            | Yes                | 75.6% | 57.8% | 8.9%  | 8.9%  | 84.4% | 2.2%  |
| Place of delivery          | Health institution | 68.5% | 50.5% | 14.3% | 7.3%  | 75.1% | 8.1%  |
|                            | Home               | 77.8% | 38.9% |       | 5.6%  | 77.8% | 5.6%  |
| Type of pregnancy          | Single             | 67.6% | 47.0% | 11.9% | 6.5%  | 71.9% | 11.4% |
|                            | Multiple           | 71.7% | 54.7% | 16.0% | 8.5%  | 81.1% | 1.9%  |
| APGAR 1 <sup>st</sup> min. | <7                 | 71.2% | 57.7% | 12.8% | 7.1%  | 75.0% | 5.8%  |
|                            | >=7                | 66.7% | 40.7% | 14.1% | 7.4%  | 75.6% | 10.4% |
| APGAR 5 <sup>th</sup> min. | <7                 | 74.6% | 60.6% | 14.1% | 8.5%  | 73.2% | 5.6%  |
|                            | >=7                | 67.3% | 46.4% | 13.2% | 6.8%  | 75.9% | 8.6%  |
| weight category(gram)      | <1000              | 67.7% | 74.2% | 12.9% | 9.7%  | 80.6% | 0.0%  |
|                            | 1000-1499          | 68.1% | 57.4% | 12.8% | 9.6%  | 75.5% | 8.5%  |
|                            | 1500-2499          | 69.9% | 41.0% | 13.9% | 5.4%  | 74.1% | 9.0%  |

### Factors associated with mortality of preterm low birth weight neonates

Preterm LBW neonates with sepsis had two times higher odds of mortality compared to those without sepsis (AOR: 2.0 ;( 95% CI: 1.03-3.89)). Preterm LBW neonates diagnosed with RDS had 4.6 times higher odds of mortality than those without RDS (AOR: 4.6; (95% CI: 2.51-8.40)).

Preterm LBW neonates with a diagnosis of hypoglycemia had 3.91 times higher odds of mortality than their counterparts (AOR 3.91; (95%CI: 1.09-10.52)).

Preterm LBW neonates with fifth minute APGAR score of greater than seven had 61% times less likely to die than their counterparts(AOR 0.39; (95%CI: (.18-.82)). Preterm LBW neonates with

duration of hospital stay above mean duration ( $\geq 9.82$  days) had 83% lower odds of mortality than their counterparts (AOR 0.17; (95%CI: 0.09-0.33)) (Table 6).

**Table 6:** Multivariate logistic regression analysis of factors associated with mortality of preterm low birth weight neonates admitted to NICU in Amhara region referral hospitals, Ethiopia, 2019 ( $n=291$ ).

| Characteristics                 | Category    | Alive | Death | COR(95%CI)      | AOR(95% CI)      | P> z   |
|---------------------------------|-------------|-------|-------|-----------------|------------------|--------|
| Sepsis                          | No          | 69    | 21    | 1               | 1                |        |
|                                 | Yes         | 112   | 89    | 2.61(1.49-4.58) | 2.0(1.03-3.89)   | 0.040* |
| RDS                             | No          | 115   | 31    | 1               | 1                |        |
|                                 | Yes         | 66    | 79    | 4.44(2.66-7.42) | 4.6(2.51-8.40)   | 0.000* |
| Congenital anomaly              | No          | 170   | 97    | 1               | 1                |        |
|                                 | Yes         | 11    | 13    | 2.07(.89-4.81)  | 2.41(.87-6.67)   | 0.090  |
| Hypoglycemia                    | No          | 172   | 98    | 1               | 1                |        |
|                                 | Yes         | 9     | 12    | 2.34(.95-5.75)  | 3.91(1.09-10.52) | 0.035* |
| Hypothermia                     | No          | 50    | 22    | 1               | 1                |        |
|                                 | Yes         | 131   | 88    | 1.53(.86-2.7)   | 1.58(.79-3.14)   | 0.192  |
| Maternal History of PIH         | No          | 158   | 88    | 1               | 1                |        |
|                                 | Yes         | 23    | 22    | 1.72(.91-3.26)  | 1.76(.81-3.83)   | 0.155  |
| APGAR 1 <sup>st</sup> minute    | <7          | 45    | 90    | 0.7(.43- 1.13)  | 1.12(.57-2.20)   | 0.737  |
|                                 | $\geq 7$    | 65    | 91    |                 |                  |        |
| APGAR 5 <sup>th</sup> minute    | <7          | 65    | 56    | 0.39(.25-.68)   | 0.39(.18-.82)    | 0.013* |
|                                 | $\geq 7$    | 106   | 46    | 1               | 1                |        |
| Duration of hospital stay(days) | <9.82       | 95    | 21    | 0.214(.12-.37)  | 0.17(.09-.33)    | 0.000* |
|                                 | $\geq 9.82$ | 86    | 89    | 1               | 1                |        |

NB: \*=significant at p-value<0.05 in multivariable analysis, 1=considered as reference category  
 PIH= pregnancy induced hypertension  
 9.8179=Mean duration of hospital stay from admission to discharge(alive) or to death (days)

## Discussion

### Background

This retrospective follow-up study conducted to determine the morbidity and mortality patterns in preterm LBW neonates, and identify factors associated with mortality.

### General finding

In this study, the overall rate of preterm LBW neonatal mortality was 37.8 % (95%CI: 32.4-43.5). The present study also revealed that neonatal hypothermia (75.26%), sepsis (69.07%), RDS (49.83%), jaundice (13.4%), and the presence of congenital anomalies (8.25%) were the most common morbidities and the reasons for admission to NICU. Moreover, Sepsis, respiratory distress, hypoglycemia, APGAR score at fifth minute <7 and duration of hospital stay below the mean were independently associated with mortality.

### Comparison with similar studies

In the current study, approximately 37.8 % (95%CI: 32.4-43.5) preterm LBW neonates were died. This result was higher than that found by studies conducted in India at 6.5%(18) and Iran at 28.7%(21). A key difference between the present study and the previous study conducted in Iran was that the previous study excluded neonates with severe fetal malformations whereas the present study did not exclude those neonates, which may have increased the mortality risk of neonates in the sample. This discrepancy with the study conducted in India may be because this study focused only on short-term outcomes, whereas the present study covered a longer neonatal period.

1  
2  
3 The present finding of the overall mortality rate is lower than that of studies conducted in Isfahan  
4 city, Iran 64.4 %(22)and Telangana, India88.8%(23). This difference may be related to  
5  
6 differences in the inclusion criteria between the studies, where the study in Iran included  
7  
8 neonates with birth weights of less than 1500 g and those with a gestational age of less than 30  
9  
10 weeks. The risk of mortality is considerably higher in neonates with lower birthweights and  
11  
12 gestational age.  
13  
14  
15

16  
17 The current study also revealed that neonatal hypothermia (75.26%), sepsis (69.07%), RDS,  
18  
19 (49.83%), jaundice, (13.4%), and congenital anomalies (8.25%) were the most common  
20  
21 morbidities and reasons for admission to the NICU. This result is supported by studies conducted  
22  
23 in Sharda hospital, India (16), Western Nepal(24), Telangana, India(18), Isfahan city, Iran(22),  
24  
25 teaching hospital, Telangana, India (23), New South Wales, and the Australian Capital  
26  
27 Territory(25).  
28  
29  
30

31  
32 In the present study, preterm LBW neonates with sepsis had two times higher odds of mortality  
33  
34 compared to neonates without sepsis (AOR: 2.0(95% CI: 95% CI: 1.03-3.89). This result is in  
35  
36 agreement with those of a study conducted in Telangana, India (18), New South Wales and  
37  
38 Australian Capital Territory (25), and Mahatma Gandhi Memorial Government Hospital, India  
39  
40 (26). A possible reason for this is that preterm LBW neonates typically have immature host  
41  
42 defense mechanisms making them susceptible to devastating infections that can often lead to  
43  
44 neonatal death.  
45  
46  
47  
48

49  
50 In addition, preterm LBW neonates diagnosed with RDS had 4.6 times higher odds of mortality  
51  
52 than preterm low birth weight neonates without RDS (AOR: 4.6 (95% CI: 2.51-8.40). This result  
53  
54 is supported by studies conducted at Aga Khan University Hospital, Karachi, Pakistan(6),  
55  
56

1  
2  
3     Telangana, India(18), New South Wales and Australian Capital Territory (25), and Mahatma  
4  
5     Gandhi Memorial Government Hospital, India(26). A possible reason for this is that neonates  
6  
7     with RDS often have the complication of lung collapse, which may facilitate death more readily  
8  
9     in preterm LBW neonates.

10  
11  
12  
13     Preterm LBW neonates with a diagnosis of hypoglycemia had 3.91 higher of odds of mortality  
14  
15     than who had no diagnosis of hypoglycemia (AOR 3.91; (95%CI: 1.09-10.52)). This finding  
16  
17     supports those studies conducted in Telangana, India (18) and Mahatma Gandhi Memorial  
18  
19     Government Hospital (26). This may be related to preterm neonates having immature organs,  
20  
21     often leading to failure in glycogen storage and ultimately causing death.

22  
23  
24  
25     In addition, this study found that preterm LBW neonates with a fifth minute APGAR score of  
26  
27     greater than seven had 61% lower likely to die than their counterparts(AOR 0.39; (95%CI: (.18-  
28  
29     .82)). This result is supported by the study conducted in China (27).A possible reason for this  
30  
31     study may be that an APGAR score of less than seven indicates neonates in an asphyxiated state  
32  
33     which implies indirect death of the neonate.

34  
35  
36  
37  
38     Preterm LBW neonates with a length of hospital stay above the mean duration ( $\geq 9.82$  days) had  
39  
40     83% lower odds of mortality than their counterparts (AOR 0.17; (95%CI: 0.09-0.33)). This may  
41  
42     be the reason why the short length of hospital stay indicates the lower neonatal age, is  
43  
44     predisposed to the risk of being unable to adapt to the environment and can develop different  
45  
46     complications that can lead to mortality.

47  
48  
49  
50     This study was conducted at two referral hospitals in the region, thus increasing the  
51  
52     generalizability of the findings to the entire population. This study had some limitations. As this  
53  
54

1  
2  
3 was a retrospective study, it did not address some of the participant-related associations of  
4 mortality in preterm LBW neonates.  
5  
6

### 7 8 **Policy implication and future research** 9

10  
11 Currently, some trials running aim to implement novel techniques for the prevention of preterm  
12 LBW births and to reduce neonatal morbidity and mortality related to preterm LBW in Ethiopia.  
13  
14 In 2012, the World health assembly put a plan for the year 2025 third target of 30%  
15 reduction,3% relative reduction per year in low birth weight between 2012 and 2025 by applying  
16 multiple interventions at the country and community level, pre pregnancy interventions and  
17 antenatal care interventions for all women(28). However, the current study's findings indicated  
18 that preterm LBW related morbidity and mortality were high owing to different associated  
19 factors. This highlights that neonates born prematurely and with low birth weight are at a higher  
20 risk of developing comorbidities and related mortalities. Thus, the government of Ethiopia needs  
21 to strengthen existing trials and strategies to decrease the proportion of different morbidities and  
22 preterm and LBW related mortality in neonates by preventing predictive factors. In addition to  
23 governmental organizations, other non-governmental organizations should focus on morbidity  
24 and mortality reduction intervention programs to control the prevalence of different morbidities  
25 and mortalities in preterm LBW neonates. Additional attention should be given to preterm LBW  
26 neonates with sepsis, respiratory distress, hypoglycemia, Apgar score at fifth minute <7 and  
27 duration of hospital stay below the mean. Preterm LBW neonates diagnosed with sepsis have a  
28 significant impact on their mortality. Similar findings in a previous study confirmed that sepsis  
29 can affect the survival status of neonates(18), (25). Immature host defense mechanisms make  
30 preterm neonates susceptible to devastating infections that can lead to death. In this study,  
31  
32  
33  
34  
35  
36  
37  
38  
39  
40  
41  
42  
43  
44  
45  
46  
47  
48  
49  
50  
51  
52  
53  
54  
55  
56

1  
2  
3 Preterm neonates diagnosed with RDS also had higher mortality. Other similar findings indicated  
4 that if neonate is with RDS diagnosis had high risk of mortality (6), (18), (25). RDS creates  
5 respiratory insufficiency in neonates that may leads to death. Preterm LBW a neonate with  
6 hypoglycemia morbidity is also had high risk of mortality. Other similar findings showed that  
7 neonates with diagnosis of hypoglycemia had high mortality (18), (26). Since preterm neonates  
8 having immature organs, often leading to failures in glycogen storage and ultimately causing  
9 death. Health education and motivation should be given for those mothers who had preterm low  
10 birth weight neonates with sepsis , respiratory distress , hypoglycemia, APGAR score at fifth  
11 minute <7 and duration of hospital stay below mean. Different concerned bodies at different  
12 health institutions including clinicians should be encouraged to minimize the risk of different  
13 morbidities and mortalities.  
14  
15  
16  
17  
18  
19  
20  
21  
22  
23  
24  
25  
26  
27

### 28 29 **Abbreviations**

30  
31  
32 DM: Diabetes Mellitus, FHRH: Felege Hiwot Referral Hospital, GA: Gestational Age, HIV:  
33 Human Immune Virus, LBW: Low Birth Weight, NEC: Necrotizing Enter colitis, NICU:  
34 Neonatal Intensive Care Unit, PIH: Pregnancy Induced Hypertension, PTLBW: Preterm Low  
35 Birth Weight, RDS: Respiratory Distress  
36  
37  
38  
39  
40  
41

### 42 **Ethics approval and consent to participate**

43  
44  
45 To conduct this study, an ethical clearance letter was obtained from the institutional review  
46 board of Mekelle University, college of health sciences with reference number 1270/2019.  
47  
48 Permission letters were written for FHRH and Dessie referral hospital. Data were collected after  
49  
50  
51  
52  
53  
54  
55  
56  
57  
58  
59  
60

1  
2  
3 consent of cooperation was obtained from administrators at Felege Hiwot referral hospital and  
4  
5 Dessie referral hospital.  
6

7  
8 **Patient consent for publication:** Not required  
9

10 **Availability of data and materials:** The raw data file could be provided for research purposes  
11  
12 only, upon request via e-mail of the corresponding author.  
13  
14

15  
16 **Competing interests:** The authors declare that they have no competing interests.  
17  
18

19 **Funding:** There is no received specific grant from any funding agency  
20  
21

## 22 **Authors' contributions**

23  
24 All authors contributed equally to this work. YD, BF, MS & DT participated in all phases of the  
25  
26 study including topic selection, design, data collection, data analysis, and interpretation. All  
27  
28 authors also contribute to writing this manuscript. All authors read and approved the final  
29  
30 manuscript.  
31  
32  
33

## 34 **Acknowledgement**

35  
36 It is our pleasure to thank Felege Hiwot referral hospital and Dessie referral hospital staffs of  
37  
38 pediatric, neonatology care team, and the card extractors. It is also our pleasure to thank the data  
39  
40 collectors and supervisors.  
41  
42  
43  
44  
45  
46  
47  
48  
49  
50  
51  
52  
53  
54  
55  
56  
57  
58  
59  
60



## References

1. WHO. Survive & thrive. *Delic Living*. 2019;29(8):20–37.
2. Lau C, Ambalavanan N, Chakraborty H, Wingate MS, Carlo WA. Extremely low birth weight and infant mortality rates in the United States. *Pediatrics*. 2013;131(5):855–60.
3. Article O. Neonatal Morbidity and Mortality Pattern in a Tertiary Care Neonatal Unit of a Teaching Hospital. 2014;4:7–12.
4. Aah P, Thuvarakan P, Mvc DS. Classification of perinatal deaths according to ICD-PM : An audit on perinatal post-mortems in a tertiary care centre in Sri Lanka. 2017;(June):31–5.
5. Hamid F, Quaium SMM, Rahman A, Ahmad AR, Khan S, Hussain T, et al. Audit of Neonatal Morbidity and Mortality in A Tertiary Care Hospital, Sylhet. *Chattagram Maa-O-Shishu Hosp Med Coll J*. 2017;15(2):45–8.
6. Khan MR, Maheshwari PK, Shamim H, Ahmed S, Ali SR. Morbidity pattern of sick hospitalized preterm infants in Karachi, Pakistan. *J Pak Med Assoc*. 2012;62(4):386–8.
7. Mengesha HG, Wuneh AD, Lerebo WT, Tekle TH. Survival of neonates and predictors of their mortality in Tigray region , Northern Ethiopia : prospective cohort study. *BMC Pregnancy Childbirth* [Internet]. 2016;(December):1–13. Available from: <http://dx.doi.org/10.1186/s12884-016-0994-9>
8. Kebede B, Gebeyehu A, Sharma HR, Yifru S. Prevalence and associated factors of neonatal mortality in North Gondar Zone, Northwest Ethiopia. *Ethiop J Heal Dev*.

- 2012;26(2):66–71.
9. Kassie A, Mekasha A, Tadesse BT, Worku A. Predictors of early neonatal mortality at a neonatal intensive care unit of a specialized referral teaching hospital in Ethiopia. 2012;(January).
  10. Mekonnen T, Tenu T, Aklilu T AT (2018). Assessment of Neonatal Death and Causes among Admitted Neonates in Neonatal Intensive Care Unit of Mizan Tepi University Teaching Hospital, Bench Maji Zone, South-West Ethiopia, 2018. *Clinics Mother Child Health*. 2018;15(4).
  11. Chidiebere ODI, Uchenna E, Christian I, Nwabueze AI, Stephen AO, Ifeyinwa O. The Low-birth weight Infants: Pattern of Morbidity and Mortality in a Tertiary Healthcare Facility in the South Eastern Nigeria. *Ann Med Health Sci Res*. 2018;8(April):4–10.
  12. Janaswamy VS, Kodandapani Y, Lathasree P. Mortality and Morbidity Profile of Low Birth Weight Babies at a Tertiary Care Hospital. *IOSR J Dent Med Sci Ver I*. 2016;15(3):2279–861.
  13. Mukherjee S, Shaw SC, Devgan A, Srivastava AK, Mallige A. Survival and morbidities in very low birth weight (VLBW) infants in a tertiary care teaching hospital. *Int J Contemp Pediatr*. 2017;4(6):2170.
  14. Arakhita Swain NN. [Http://Www.Omicsgroup.Org/Journals/Pulmonary-Agenesis-With-Dextrocardia-and-Hypertrophic-Cardiomyopathy-First-Case-Report-2167-0897.1000141.Php?Aid=26283](http://www.omicsgroup.org/journals/Pulmonary-Agenesis-With-Dextrocardia-and-Hypertrophic-Cardiomyopathy-First-Case-Report-2167-0897.1000141.Php?Aid=26283). *J Neonatal Biol*. 2014;03(03).

15. Baki MA, Haque A, Mohsin F, Nahar J, Akhter S, Begum T, et al. Risk Factors for Mortality in Neonates with Birth Weight <1500 gm. *BIRDEM Med J*. 2012;2(1):19–22.
16. Hassan N, Mukhopadhyay S, Mohan S. Morbidity and mortality profile of preterm neonates admitted in neonatal intensive care unit of a tertiary care centre in Western Uttar Pradesh, India. *Int J Contemp Pediatr*. 2019;6(5):1859.
17. View of Prevalence and Outcome of Preterm Neonates Admitted to Neonatal Unit of a Tertiary Care Center in Western Nepal, 2015.
18. Hasthi UR, Ashwani N, Kumar CS, Chejeti SR. Morbidity and Mortality Patterns in Small for Gestational Age versus Appropriate for Gestational Age Preterm Neonates Admitted in Level II Neonatal Intensive Care Unit : A Observational Study. 2017;4(10):133–6.
19. (EWE Child. The global strategy for women's children's and adolescents' health (2016-2030):. I at glance . 2015. ). STRATEGY. 2016;
20. Yehuala S, Teka Z. Yehuala S, Teka Z. Survival Analysis of Premature Infants Admitted to Neonatal Intensive Care Unit ( NICU ) in Northwest Ethiopia using Semi-Parametric Frailty Model *Journal of Biometrics & Biostatistics*. 2015;6(1):1–12. 2015;6(1):1–12.
21. Ghorbani F, Heidarzadeh M, Dastgiri S, Ghazi M, Farshi MR. Survival of Premature and Low Birth Weight Infants : A Multicenter , Prospective , Cohort Study in Iran. 2017;8(1).
22. Navaei F, Aliabady B, Moghtaderi J, Moghtaderi M, Kelishadi R. Early outcome of preterm infants with birth weight of 1500 g or less and gestational age of 30 weeks or less in Isfahan city, Iran. 2010;6(3).

- 1  
2  
3 23. Pabbati J, Subramanian P, Renikuntla M. Morbidity and mortality of low birth weight  
4 babies in early neonatal period in a rural area teaching hospital, Telangana, India. *Int J*  
5 *Contemp Pediatr*. 2019;6(4):1582.  
6  
7  
8  
9  
10  
11 24. View of Prevalence and Outcome of Preterm Neonates Admitted to Neonatal Unit of a  
12 Tertiary Care Center in Western Nepal ,2015.  
13  
14  
15  
16 25. Schindler T, Koller-smith L, Lui K, Bajuk B, Bolisetty S. Causes of death in very preterm  
17 infants cared for in neonatal intensive care units : a population-based retrospective cohort  
18 study. 2017;1–9.  
19  
20  
21  
22  
23  
24 26. Saminathan D, Mythili B, Ramesh E, Zacharias AM. Incidence , Mortality Pattern , and  
25 Outcome of Low Birth Weight Babies Admitted in a Rural Tertiary Care Center : A  
26 Retrospective Study. 2016;4(1):51–4.  
27  
28  
29  
30  
31  
32 27. Kong X, Xu F, Wu R, Wu H, Ju R, Zhao X, et al. Neonatal mortality and morbidity  
33 among infants between 24 to 31 complete weeks : a multicenter survey in China from  
34 2013 to. *BMC Pediatr* [Internet]. 2016;1–8. Available from:  
35  
36  
37 <http://dx.doi.org/10.1186/s12887-016-0716-5>  
38  
39  
40  
41  
42 28. Asia S. WHO. Global nutrition targets 2025: low birth weight policy brief . 2014;1–8.  
43  
44  
45  
46  
47  
48  
49  
50  
51  
52  
53  
54  
55  
56  
57  
58  
59  
60

1  
2  
3  
4  
5  
6  
7  
8  
9  
10  
11  
12  
13  
14  
15  
16  
17  
18  
19  
20  
21  
22  
23  
24  
25  
26  
27  
28  
29  
30  
31  
32  
33  
34  
35  
36  
37  
38  
39  
40  
41  
42  
43  
44  
45  
46  
47  
48  
49  
50  
51  
52  
53  
54  
55  
56  
57  
58  
59  
60

For peer review only

# Reporting checklist for cross sectional study.

Based on the STROBE cross sectional guidelines.

## Instructions to authors

Complete this checklist by entering the page numbers from your manuscript where readers will find each of the items listed below.

Your article may not currently address all the items on the checklist. Please modify your text to include the missing information. If you are certain that an item does not apply, please write "n/a" and provide a short explanation.

Upload your completed checklist as an extra file when you submit to a journal.

In your methods section, say that you used the STROBE cross sectional reporting guidelines, and cite them as:

von Elm E, Altman DG, Egger M, Pocock SJ, Gøtzsche PC, Vandenbroucke JP. The Strengthening the Reporting of Observational Studies in Epidemiology (STROBE) Statement: guidelines for reporting observational studies.

| Reporting Item                                                                                                                 | Page Number |
|--------------------------------------------------------------------------------------------------------------------------------|-------------|
| <b>Title and abstract</b>                                                                                                      |             |
| Title <a href="#">#1a</a> Indicate the study's design with a commonly used term in the title or the abstract                   | 1           |
| Abstract <a href="#">#1b</a> Provide in the abstract an informative and balanced summary of what was done and what was found   | 2           |
| <b>Introduction</b>                                                                                                            |             |
| Background / rationale <a href="#">#2</a> Explain the scientific background and rationale for the investigation being reported | 4 -5        |
| Objectives <a href="#">#3</a> State specific objectives, including any prespecified hypotheses                                 | 5           |
| <b>Methods</b>                                                                                                                 |             |

|    |                      |                      |                                                                                            |      |
|----|----------------------|----------------------|--------------------------------------------------------------------------------------------|------|
| 1  |                      |                      |                                                                                            |      |
| 2  |                      |                      |                                                                                            |      |
| 3  |                      |                      |                                                                                            |      |
| 4  | Study design         | <a href="#">#4</a>   | Present key elements of study design early in the paper                                    | 6    |
| 5  |                      |                      |                                                                                            |      |
| 6  | Setting              | <a href="#">#5</a>   | Describe the setting, locations, and relevant dates, including periods of recruitment,     | 6    |
| 7  |                      |                      | exposure, follow-up, and data collection                                                   |      |
| 8  |                      |                      |                                                                                            |      |
| 9  |                      |                      |                                                                                            |      |
| 10 |                      |                      |                                                                                            |      |
| 11 | Eligibility criteria | <a href="#">#6a</a>  | Give the eligibility criteria, and the sources and methods of selection of participants    | 6\$7 |
| 12 |                      |                      |                                                                                            |      |
| 13 |                      |                      |                                                                                            |      |
| 14 |                      | <a href="#">#7</a>   | Clearly define all outcomes, exposures, predictors, potential confounders, and effect      |      |
| 15 |                      |                      | modifiers. Give diagnostic criteria, if applicable NA                                      |      |
| 16 |                      |                      |                                                                                            |      |
| 17 |                      |                      |                                                                                            |      |
| 18 | Data sources /       | <a href="#">#8</a>   | For each variable of interest give sources of data and details of methods of assessment    |      |
| 19 | measurement          |                      | (measurement). Describe comparability of assessment methods if there is more than one      |      |
| 20 |                      |                      | group. Give information separately for for exposed and unexposed groups if applicable      |      |
| 21 |                      |                      |                                                                                            |      |
| 22 |                      |                      |                                                                                            |      |
| 23 |                      |                      | NA.                                                                                        |      |
| 24 |                      |                      |                                                                                            |      |
| 25 |                      |                      |                                                                                            |      |
| 26 | Bias                 | <a href="#">#9</a>   | Describe any efforts to address potential sources of bias                                  | 7    |
| 27 |                      |                      |                                                                                            |      |
| 28 |                      |                      |                                                                                            |      |
| 29 | Study size           | <a href="#">#10</a>  | Explain how the study size was arrived at                                                  | 7    |
| 30 |                      |                      |                                                                                            |      |
| 31 | Quantitative         | <a href="#">#11</a>  | Explain how quantitative variables were handled in the analyses. If applicable, describe   |      |
| 32 |                      |                      | which groupings were chosen, and why NA.                                                   |      |
| 33 | variables            |                      |                                                                                            |      |
| 34 |                      |                      |                                                                                            |      |
| 35 |                      |                      |                                                                                            |      |
| 36 | Statistical methods  | <a href="#">#12a</a> | Describe all statistical methods, including those used to control for confounding          | 9&10 |
| 37 |                      |                      |                                                                                            |      |
| 38 | Statistical methods  | <a href="#">#12b</a> | Describe any methods used to examine subgroups and interactions NA                         | 9&10 |
| 39 |                      |                      |                                                                                            |      |
| 40 |                      |                      |                                                                                            |      |
| 41 | Statistical methods  | <a href="#">#12c</a> | Explain how missing data were addressed                                                    | 9&10 |
| 42 |                      |                      |                                                                                            |      |
| 43 |                      |                      |                                                                                            |      |
| 44 | Statistical methods  | <a href="#">#12d</a> | If applicable, describe analytical methods taking account of sampling strategy NA          |      |
| 45 |                      |                      |                                                                                            |      |
| 46 | Statistical methods  | <a href="#">#12e</a> | Describe any sensitivity analyses NA                                                       |      |
| 47 |                      |                      |                                                                                            |      |
| 48 |                      |                      |                                                                                            |      |
| 49 | <b>Results</b>       |                      |                                                                                            |      |
| 50 |                      |                      |                                                                                            |      |
| 51 |                      |                      |                                                                                            |      |
| 52 | Participants         | <a href="#">#13a</a> | Report numbers of individuals at each stage of study—eg numbers potentially eligible,      |      |
| 53 |                      |                      | examined for eligibility, confirmed eligible, included in the study, completing follow-up, |      |
| 54 |                      |                      | and analysed. Give information separately for for exposed and unexposed groups if          |      |
| 55 |                      |                      |                                                                                            |      |
| 56 |                      |                      |                                                                                            |      |
| 57 |                      |                      |                                                                                            |      |
| 58 |                      |                      |                                                                                            |      |
| 59 |                      |                      |                                                                                            |      |
| 60 |                      |                      |                                                                                            |      |

|    |                  |                                                                                                                 |        |
|----|------------------|-----------------------------------------------------------------------------------------------------------------|--------|
| 1  |                  |                                                                                                                 |        |
| 2  |                  |                                                                                                                 |        |
| 3  |                  | applicable. NA                                                                                                  |        |
| 4  |                  |                                                                                                                 |        |
| 5  |                  |                                                                                                                 |        |
| 6  | Participants     | <a href="#">#13b</a> Give reasons for non-participation at each stage NA                                        |        |
| 7  |                  |                                                                                                                 |        |
| 8  | Participants     | <a href="#">#13c</a> Consider use of a flow diagram NA                                                          |        |
| 9  |                  |                                                                                                                 |        |
| 10 |                  |                                                                                                                 |        |
| 11 | Descriptive data | <a href="#">#14a</a> Give characteristics of study participants (eg demographic, clinical, social) and          | 10-12  |
| 12 |                  | information on exposures and potential confounders. Give information separately for                             |        |
| 13 |                  | exposed and unexposed groups if applicable.                                                                     |        |
| 14 |                  |                                                                                                                 |        |
| 15 |                  |                                                                                                                 |        |
| 16 |                  |                                                                                                                 |        |
| 17 | Descriptive data | <a href="#">#14b</a> Indicate number of participants with missing data for each variable of interest NA         |        |
| 18 |                  |                                                                                                                 |        |
| 19 |                  |                                                                                                                 |        |
| 20 | Outcome data     | <a href="#">#15</a> Report numbers of outcome events or summary measures. Give information separately           |        |
| 21 |                  | for exposed and unexposed groups if applicable. NA                                                              |        |
| 22 |                  |                                                                                                                 |        |
| 23 |                  |                                                                                                                 |        |
| 24 | Main results     | <a href="#">#16a</a> Give unadjusted estimates and, if applicable, confounder-adjusted estimates and their      | 15\$16 |
| 25 |                  | precision (eg, 95% confidence interval). Make clear which confounders were adjusted for                         |        |
| 26 |                  | and why they were included                                                                                      |        |
| 27 |                  |                                                                                                                 |        |
| 28 |                  |                                                                                                                 |        |
| 29 |                  |                                                                                                                 |        |
| 30 | Main results     | <a href="#">#16b</a> Report category boundaries when continuous variables were categorized                      | 16     |
| 31 |                  |                                                                                                                 |        |
| 32 |                  |                                                                                                                 |        |
| 33 | Main results     | <a href="#">#16c</a> If relevant, consider translating estimates of relative risk into absolute risk for a      |        |
| 34 |                  | meaningful time period NA                                                                                       |        |
| 35 |                  |                                                                                                                 |        |
| 36 |                  |                                                                                                                 |        |
| 37 |                  |                                                                                                                 |        |
| 38 | Other analyses   | <a href="#">#17</a> Report other analyses done—e.g., analyses of subgroups and interactions, and                |        |
| 39 |                  | sensitivity analyses NA                                                                                         |        |
| 40 |                  |                                                                                                                 |        |
| 41 |                  |                                                                                                                 |        |
| 42 | Discussion       |                                                                                                                 |        |
| 43 |                  |                                                                                                                 |        |
| 44 |                  |                                                                                                                 |        |
| 45 | Key results      | <a href="#">#18</a> Summarise key results with reference to study objectives                                    | 16-19  |
| 46 |                  |                                                                                                                 |        |
| 47 | Limitations      | <a href="#">#19</a> Discuss limitations of the study, taking into account sources of potential bias or          | 19     |
| 48 |                  | imprecision. Discuss both direction and magnitude of any potential bias.                                        |        |
| 49 |                  |                                                                                                                 |        |
| 50 |                  |                                                                                                                 |        |
| 51 |                  |                                                                                                                 |        |
| 52 | Interpretation   | <a href="#">#20</a> Give a cautious overall interpretation considering objectives, limitations, multiplicity of | 19\$20 |
| 53 |                  | analyses, results from similar studies, and other relevant evidence.                                            |        |
| 54 |                  |                                                                                                                 |        |
| 55 |                  |                                                                                                                 |        |
| 56 |                  |                                                                                                                 |        |
| 57 |                  |                                                                                                                 |        |
| 58 |                  |                                                                                                                 |        |
| 59 |                  |                                                                                                                 |        |
| 60 |                  |                                                                                                                 |        |



1  
2  
3  
4  
5  
6  
7  
8  
9  
10  
11  
12  
13  
14  
15  
16  
17  
18  
19  
20  
21  
22  
23  
24  
25  
26  
27  
28  
29  
30  
31  
32  
33  
34  
35  
36  
37  
38  
39  
40  
41  
42  
43  
44  
45  
46  
47  
48  
49  
50  
51  
52  
53  
54  
55  
56  
57  
58  
59  
60

Generalisability [#21](#) Discuss the generalisability (external validity) of the study results 20

#### Other Information

Funding [#22](#) Give the source of funding and the role of the funders for the present study and, if applicable, for the original study on which the present article is based 16 NA

None The STROBE checklist is distributed under the terms of the Creative Commons Attribution License CC-BY. This checklist can be completed online using <https://www.goodreports.org/>, a tool made by the [EQUATOR Network](#) in collaboration with [Penelope.ai](#)
